# Supplementary material
Source: publisher figshare collection journal article supplement (https://springernature.figshare.com/articles/dataset/_/5016140)
Supplement: Supplementary file 1 [file 1]

## Independent Evaluation of the Affordable Medicines Facility – malaria (AMFm)

### Section I: Census & Screening Information

**Interviewer completes this section for all outlets**

|                                                                                                                                                                                                                                                                                                                                                                                                                                                                                                                                                                                                                                                                                                                                         |                                    |  |
|-----------------------------------------------------------------------------------------------------------------------------------------------------------------------------------------------------------------------------------------------------------------------------------------------------------------------------------------------------------------------------------------------------------------------------------------------------------------------------------------------------------------------------------------------------------------------------------------------------------------------------------------------------------------------------------------------------------------------------------------|------------------------------------|--|
| <b>Outlet ID</b> Interviewer – District - Division - Location- Outlet Code: [ ][ ]-[ ][ ][ ][ ]-[ ][ ][ ][ ][ ]-[ ][ ][ ][ ][ ][ ]                                                                                                                                                                                                                                                                                                                                                                                                                                                                                                                                                                                                      |                                    |  |
| C1. Today's date (dd/mm/yyyy) [ ][ ]-[ ][ ]-[ 2   0   1   1 ]                                                                                                                                                                                                                                                                                                                                                                                                                                                                                                                                                                                                                                                                           |                                    |  |
| C2. Interviewer's name<br>[ ]                                                                                                                                                                                                                                                                                                                                                                                                                                                                                                                                                                                                                                                                                                           | C2a. Interviewer's code<br>[ ][ ]  |  |
| C3. District name<br>[ ]                                                                                                                                                                                                                                                                                                                                                                                                                                                                                                                                                                                                                                                                                                                | C3a. District code<br>[ ][ ][ ]    |  |
| C4. Division name<br>[ ]                                                                                                                                                                                                                                                                                                                                                                                                                                                                                                                                                                                                                                                                                                                | C4a. Division code<br>[ ][ ][ ]    |  |
| C5. Location name<br>[ ]                                                                                                                                                                                                                                                                                                                                                                                                                                                                                                                                                                                                                                                                                                                | C5a. Location code<br>[ ][ ][ ][ ] |  |
| C6. Name of outlet <i>(if no name, record "no name" or owner's name)</i><br>[ ]                                                                                                                                                                                                                                                                                                                                                                                                                                                                                                                                                                                                                                                         | C6a. Outlet code<br>[ ][ ][ ]      |  |
| C7. Type of Outlet<br>01 = Public National Referral Hospital<br>02 = Public Provincial General Hospital<br>03 = Public District/Sub-District Hospital<br>04 = Public Health Centre/ Sub-Health Centre<br>05 = Public Dispensary/ Clinic<br>06 = Registered Pharmacy<br>07 = Chemist/Drug Store (Unregistered)<br>08 = Private Hospital/Nursing Home<br>09 = Private Clinic/Dispensary<br>10 = NGO Hospital<br>11 = NGO/CBO Clinic/Dispensary<br>12 = Mission/Faith-based Hospital<br>13 = Mission/Faith-based Clinic/Dispensary<br>14 = Supermarket/ Chain Store<br>15 = Duka/Kiosk<br>16 = Market Stall<br>17 = Petrol Station/ Convenience Store<br>18 = Community Health Worker<br>19 = Hawker<br>96 = Other <i>(specify)</i><br>[ ] | [ ][ ]                             |  |
| C8. Is this location part of the booster sample?<br>1 = Yes<br>0 = No                                                                                                                                                                                                                                                                                                                                                                                                                                                                                                                                                                                                                                                                   | [ ]                                |  |

Hello, My name is \_\_\_\_\_, and I work for APHRC on behalf of Population Services International. We are conducting a study on the availability of antimalarial medicines. The results will be used to improve the availability of appropriate antimalarial treatment in Kenya. I would like to ask you a few questions to see if you could be part of the survey.

#### Screening Questions

|                                                                                                                                                                                                                                                                                                                                                                                                                                                                                                                                                            |     |
|------------------------------------------------------------------------------------------------------------------------------------------------------------------------------------------------------------------------------------------------------------------------------------------------------------------------------------------------------------------------------------------------------------------------------------------------------------------------------------------------------------------------------------------------------------|-----|
| S1. Do you have any medicines in stock today?<br>1 = Yes <b>go to S3</b><br>0 = No                                                                                                                                                                                                                                                                                                                                                                                                                                                                         | [ ] |
| S2. Are there any medicines that are out of stock today, but that you stocked in the <b>past three months?</b><br>1 = Yes <b>go to S4</b><br>0 = No <b>go to C9 before proceeding to Section VI: Ending the Interview</b><br>8 = Don't know <b>go to C9 before proceeding to Section VI: Ending the Interview</b>                                                                                                                                                                                                                                          | [ ] |
| S3. Do you have any antimalarial medicines in stock today?<br>1 = Yes <b>provide information sheet and gain consent. Record starting time in C9 before proceeding to the provider questionnaire</b><br>0 = No                                                                                                                                                                                                                                                                                                                                              | [ ] |
| S4. Are there any antimalarial medicines that are out of stock today, but that you stocked in the <b>past three months?</b><br>1 = Yes <b>provide information sheet and gain consent. Record starting time in C9 before proceeding to the provider questionnaire</b><br>0 = No <b>verify by showing prompt card of common antimalarials. Go to C9 before proceeding to Section VI: Ending the Interview</b><br>8 = Don't know <b>verify by showing prompt card of common antimalarials. Go to C9 before proceeding to Section VI: Ending the Interview</b> | [ ] |

Outlet ID: [ ]-[ ]-[ ]-[ ]-[ ]-[ ]-[ ]-[ ]-[ ]-[ ]-[ ]-[ ]

### C9. Record of Visits

|                                                                                                                                                                                                                                                                                                                                                                                                                            | Visit 1                 | Visit 2                 | Visit 3                 |
|----------------------------------------------------------------------------------------------------------------------------------------------------------------------------------------------------------------------------------------------------------------------------------------------------------------------------------------------------------------------------------------------------------------------------|-------------------------|-------------------------|-------------------------|
| Date<br>(dd/mm/yy)                                                                                                                                                                                                                                                                                                                                                                                                         | [ ]-[ ]-[ ]-[ ]-[ ]-[ ] | [ ]-[ ]-[ ]-[ ]-[ ]-[ ] | [ ]-[ ]-[ ]-[ ]-[ ]-[ ] |
| Time started<br>(use 24hr clock)<br>00:00 = Not applicable                                                                                                                                                                                                                                                                                                                                                                 | [ ]:[ ]:[ ]             | [ ]:[ ]:[ ]             | [ ]:[ ]:[ ]             |
| Time completed<br>(use 24hr clock)<br>00:00 = Not applicable                                                                                                                                                                                                                                                                                                                                                               | [ ]:[ ]:[ ]             | [ ]:[ ]:[ ]             | [ ]:[ ]:[ ]             |
| Result                                                                                                                                                                                                                                                                                                                                                                                                                     | [ ]                     | [ ]                     | [ ]                     |
| 01 = Completed interview <b>go to E1</b><br>02 = Outlet does not meet screening criteria <b>go to E1</b><br>03 = Interview interrupted <b>go to C10</b><br>04 = Eligible respondent not available/ Time not convenient for interview <b>go to C10</b><br>05 = Outlet not open at the time <b>go to C10</b><br>06 = Outlet closed permanently <b>go to E1</b><br>96 = Other (specify): [ ]<br>97 = Refused <b>go to C11</b> |                         |                         |                         |

C10. If it will be possible to complete the interview at another time, note this time here, and return then. If it is not possible to complete the interview at another time, go to E1.

### Refusal

C11. If the provider refused, why?

- 1 = Client load **Ask the provider if there is a better time they would prefer to be interviewed and note the time in C10**
- 2 = Thinks it's an inspection / nervous about license **go to E1**
- 3 = Not interested **go to E1**
- 6 = Other (specify) [ ] **go to E1**
- 7 = Refuses to give reason **go to E1**

[ ]

### Section VI: Ending the Interview

If the provider answered 'yes' to S3 or S4, proceed to the provider questionnaire. DO NOT ask these questions until all other sections of the questionnaire are complete

|                                                                                                                                      |                                                                    |                                                                                                                                                                   |
|--------------------------------------------------------------------------------------------------------------------------------------|--------------------------------------------------------------------|-------------------------------------------------------------------------------------------------------------------------------------------------------------------|
| E1. Name of interviewee:<br>5 = Not applicable, no respondent<br>7 = Refused                                                         |                                                                    | [ ]                                                                                                                                                               |
| E2. Physical address or location identifiers of outlet (not PO box)<br>(Give detailed description that will help to find the outlet) |                                                                    | E3. Telephone number<br>9999999995 = Not applicable, no respondent or has no telephone<br>9999999997 = Refused<br>[ ]-[ ]-[ ]-[ ]-[ ]-[ ]-[ ]-[ ]-[ ]-[ ]-[ ]-[ ] |
| E4. Latitude: [ ]-[ ]-[ ]-[ ]-[ ]-[ ]-[ ]-[ ]-[ ]-[ ]-[ ]-[ ]                                                                        | E5. Longitude: [E]-[ ]-[ ]-[ ]-[ ]-[ ]-[ ]-[ ]-[ ]-[ ]-[ ]-[ ]-[ ] |                                                                                                                                                                   |
| E6. Do you have any questions or comments for us? (record provider's comments, if any)                                               |                                                                    |                                                                                                                                                                   |
| E7. Additional observations by interviewer (if any)                                                                                  |                                                                    |                                                                                                                                                                   |

THANK THE PROVIDER AND END INTERVIEW

**Section II: Provider Questionnaire**

**Before starting the provider questionnaire, ensure that you have distributed and explained the information sheet, and obtained informed consent.**

|                                                                                                                                                                                                                                                                                                                                                                                                                                                                                                                                                                                                                                                                                                                                                                                                                                                                                                                                                                                                                                              |                       |        |                           |        |                 |        |                    |        |                  |        |                      |        |                                  |        |                                         |        |                  |        |              |        |                                    |        |                                     |        |                                      |        |  |
|----------------------------------------------------------------------------------------------------------------------------------------------------------------------------------------------------------------------------------------------------------------------------------------------------------------------------------------------------------------------------------------------------------------------------------------------------------------------------------------------------------------------------------------------------------------------------------------------------------------------------------------------------------------------------------------------------------------------------------------------------------------------------------------------------------------------------------------------------------------------------------------------------------------------------------------------------------------------------------------------------------------------------------------------|-----------------------|--------|---------------------------|--------|-----------------|--------|--------------------|--------|------------------|--------|----------------------|--------|----------------------------------|--------|-----------------------------------------|--------|------------------|--------|--------------|--------|------------------------------------|--------|-------------------------------------|--------|--------------------------------------|--------|--|
| <p>P1. <b>Interviewer:</b> Is this a public health facility?</p> <p>1 = Yes <b>go to P3</b></p> <p>0 = No</p>                                                                                                                                                                                                                                                                                                                                                                                                                                                                                                                                                                                                                                                                                                                                                                                                                                                                                                                                | [ ]                   |        |                           |        |                 |        |                    |        |                  |        |                      |        |                                  |        |                                         |        |                  |        |              |        |                                    |        |                                     |        |                                      |        |  |
| <p>P2. Are you the owner of this outlet?</p> <p>1 = Yes</p> <p>0 = No</p>                                                                                                                                                                                                                                                                                                                                                                                                                                                                                                                                                                                                                                                                                                                                                                                                                                                                                                                                                                    | [ ]                   |        |                           |        |                 |        |                    |        |                  |        |                      |        |                                  |        |                                         |        |                  |        |              |        |                                    |        |                                     |        |                                      |        |  |
| <p>P3. Including yourself (and the owner), how many people work at this outlet (all staff)?</p> <p>998 = Don't know</p>                                                                                                                                                                                                                                                                                                                                                                                                                                                                                                                                                                                                                                                                                                                                                                                                                                                                                                                      | [ ][ ][ ]             |        |                           |        |                 |        |                    |        |                  |        |                      |        |                                  |        |                                         |        |                  |        |              |        |                                    |        |                                     |        |                                      |        |  |
| <p>P4. Has anybody working in this outlet, including yourself (and the owner), completed secondary school?</p> <p>1 = Yes <b>go to P6</b></p> <p>0 = No</p> <p>8 = Don't know</p>                                                                                                                                                                                                                                                                                                                                                                                                                                                                                                                                                                                                                                                                                                                                                                                                                                                            | [ ]                   |        |                           |        |                 |        |                    |        |                  |        |                      |        |                                  |        |                                         |        |                  |        |              |        |                                    |        |                                     |        |                                      |        |  |
| <p>P5. Has anybody working in this outlet, including yourself (and the owner), completed primary school?</p> <p>1 = Yes</p> <p>0 = No <b>go to P8</b></p> <p>8 = Don't know <b>go to P8</b></p>                                                                                                                                                                                                                                                                                                                                                                                                                                                                                                                                                                                                                                                                                                                                                                                                                                              | [ ]                   |        |                           |        |                 |        |                    |        |                  |        |                      |        |                                  |        |                                         |        |                  |        |              |        |                                    |        |                                     |        |                                      |        |  |
| <p>P6. Does anyone working in this outlet, including yourself (and the owner) have a health-related qualification?</p> <p>1 = Yes</p> <p>0 = No <b>go to P8</b></p> <p>8 = Don't know <b>go to P8</b></p>                                                                                                                                                                                                                                                                                                                                                                                                                                                                                                                                                                                                                                                                                                                                                                                                                                    | [ ]                   |        |                           |        |                 |        |                    |        |                  |        |                      |        |                                  |        |                                         |        |                  |        |              |        |                                    |        |                                     |        |                                      |        |  |
| <p>P7. How many people working in this outlet (including the owner) have the following types of health qualifications? <b>Read list. Enter '00' if the answer is 'none.'</b></p> <table border="0"> <tr> <td>I. Pharmacy Assistant</td> <td>[ ][ ]</td> </tr> <tr> <td>II. Pharmacy Technologist</td> <td>[ ][ ]</td> </tr> <tr> <td>III. Pharmacist</td> <td>[ ][ ]</td> </tr> <tr> <td>IV. Medical Doctor</td> <td>[ ][ ]</td> </tr> <tr> <td>V. Nurse/Midwife</td> <td>[ ][ ]</td> </tr> <tr> <td>VI. Clinical Officer</td> <td>[ ][ ]</td> </tr> <tr> <td>VII. Lab Technician/Technologist</td> <td>[ ][ ]</td> </tr> <tr> <td>VIII. Public Health Technician/ Officer</td> <td>[ ][ ]</td> </tr> <tr> <td>IX. Nutritionist</td> <td>[ ][ ]</td> </tr> <tr> <td>X. Nurse Aid</td> <td>[ ][ ]</td> </tr> <tr> <td>XI. Other 1: <b>specify</b>  _____</td> <td>[ ][ ]</td> </tr> <tr> <td>XII. Other 2: <b>specify</b>  _____</td> <td>[ ][ ]</td> </tr> <tr> <td>XIII. Other 3: <b>specify</b>  _____</td> <td>[ ][ ]</td> </tr> </table> | I. Pharmacy Assistant | [ ][ ] | II. Pharmacy Technologist | [ ][ ] | III. Pharmacist | [ ][ ] | IV. Medical Doctor | [ ][ ] | V. Nurse/Midwife | [ ][ ] | VI. Clinical Officer | [ ][ ] | VII. Lab Technician/Technologist | [ ][ ] | VIII. Public Health Technician/ Officer | [ ][ ] | IX. Nutritionist | [ ][ ] | X. Nurse Aid | [ ][ ] | XI. Other 1: <b>specify</b>  _____ | [ ][ ] | XII. Other 2: <b>specify</b>  _____ | [ ][ ] | XIII. Other 3: <b>specify</b>  _____ | [ ][ ] |  |
| I. Pharmacy Assistant                                                                                                                                                                                                                                                                                                                                                                                                                                                                                                                                                                                                                                                                                                                                                                                                                                                                                                                                                                                                                        | [ ][ ]                |        |                           |        |                 |        |                    |        |                  |        |                      |        |                                  |        |                                         |        |                  |        |              |        |                                    |        |                                     |        |                                      |        |  |
| II. Pharmacy Technologist                                                                                                                                                                                                                                                                                                                                                                                                                                                                                                                                                                                                                                                                                                                                                                                                                                                                                                                                                                                                                    | [ ][ ]                |        |                           |        |                 |        |                    |        |                  |        |                      |        |                                  |        |                                         |        |                  |        |              |        |                                    |        |                                     |        |                                      |        |  |
| III. Pharmacist                                                                                                                                                                                                                                                                                                                                                                                                                                                                                                                                                                                                                                                                                                                                                                                                                                                                                                                                                                                                                              | [ ][ ]                |        |                           |        |                 |        |                    |        |                  |        |                      |        |                                  |        |                                         |        |                  |        |              |        |                                    |        |                                     |        |                                      |        |  |
| IV. Medical Doctor                                                                                                                                                                                                                                                                                                                                                                                                                                                                                                                                                                                                                                                                                                                                                                                                                                                                                                                                                                                                                           | [ ][ ]                |        |                           |        |                 |        |                    |        |                  |        |                      |        |                                  |        |                                         |        |                  |        |              |        |                                    |        |                                     |        |                                      |        |  |
| V. Nurse/Midwife                                                                                                                                                                                                                                                                                                                                                                                                                                                                                                                                                                                                                                                                                                                                                                                                                                                                                                                                                                                                                             | [ ][ ]                |        |                           |        |                 |        |                    |        |                  |        |                      |        |                                  |        |                                         |        |                  |        |              |        |                                    |        |                                     |        |                                      |        |  |
| VI. Clinical Officer                                                                                                                                                                                                                                                                                                                                                                                                                                                                                                                                                                                                                                                                                                                                                                                                                                                                                                                                                                                                                         | [ ][ ]                |        |                           |        |                 |        |                    |        |                  |        |                      |        |                                  |        |                                         |        |                  |        |              |        |                                    |        |                                     |        |                                      |        |  |
| VII. Lab Technician/Technologist                                                                                                                                                                                                                                                                                                                                                                                                                                                                                                                                                                                                                                                                                                                                                                                                                                                                                                                                                                                                             | [ ][ ]                |        |                           |        |                 |        |                    |        |                  |        |                      |        |                                  |        |                                         |        |                  |        |              |        |                                    |        |                                     |        |                                      |        |  |
| VIII. Public Health Technician/ Officer                                                                                                                                                                                                                                                                                                                                                                                                                                                                                                                                                                                                                                                                                                                                                                                                                                                                                                                                                                                                      | [ ][ ]                |        |                           |        |                 |        |                    |        |                  |        |                      |        |                                  |        |                                         |        |                  |        |              |        |                                    |        |                                     |        |                                      |        |  |
| IX. Nutritionist                                                                                                                                                                                                                                                                                                                                                                                                                                                                                                                                                                                                                                                                                                                                                                                                                                                                                                                                                                                                                             | [ ][ ]                |        |                           |        |                 |        |                    |        |                  |        |                      |        |                                  |        |                                         |        |                  |        |              |        |                                    |        |                                     |        |                                      |        |  |
| X. Nurse Aid                                                                                                                                                                                                                                                                                                                                                                                                                                                                                                                                                                                                                                                                                                                                                                                                                                                                                                                                                                                                                                 | [ ][ ]                |        |                           |        |                 |        |                    |        |                  |        |                      |        |                                  |        |                                         |        |                  |        |              |        |                                    |        |                                     |        |                                      |        |  |
| XI. Other 1: <b>specify</b>  _____                                                                                                                                                                                                                                                                                                                                                                                                                                                                                                                                                                                                                                                                                                                                                                                                                                                                                                                                                                                                           | [ ][ ]                |        |                           |        |                 |        |                    |        |                  |        |                      |        |                                  |        |                                         |        |                  |        |              |        |                                    |        |                                     |        |                                      |        |  |
| XII. Other 2: <b>specify</b>  _____                                                                                                                                                                                                                                                                                                                                                                                                                                                                                                                                                                                                                                                                                                                                                                                                                                                                                                                                                                                                          | [ ][ ]                |        |                           |        |                 |        |                    |        |                  |        |                      |        |                                  |        |                                         |        |                  |        |              |        |                                    |        |                                     |        |                                      |        |  |
| XIII. Other 3: <b>specify</b>  _____                                                                                                                                                                                                                                                                                                                                                                                                                                                                                                                                                                                                                                                                                                                                                                                                                                                                                                                                                                                                         | [ ][ ]                |        |                           |        |                 |        |                    |        |                  |        |                      |        |                                  |        |                                         |        |                  |        |              |        |                                    |        |                                     |        |                                      |        |  |
| <p>P8. Of all of the people who work here, how many prescribe or dispense medicines?</p> <p><b>Crosscheck response with what is recorded in P3</b></p> <p>998 = Don't know</p>                                                                                                                                                                                                                                                                                                                                                                                                                                                                                                                                                                                                                                                                                                                                                                                                                                                               | [ ][ ][ ]             |        |                           |        |                 |        |                    |        |                  |        |                      |        |                                  |        |                                         |        |                  |        |              |        |                                    |        |                                     |        |                                      |        |  |

Provider Knowledge

|                                                                                                                                                                                                                                                                                                                                                                                                                                                                                                                                                                                                                                                                                                                                                                                                                                                                                                                                                                                                                               |            |
|-------------------------------------------------------------------------------------------------------------------------------------------------------------------------------------------------------------------------------------------------------------------------------------------------------------------------------------------------------------------------------------------------------------------------------------------------------------------------------------------------------------------------------------------------------------------------------------------------------------------------------------------------------------------------------------------------------------------------------------------------------------------------------------------------------------------------------------------------------------------------------------------------------------------------------------------------------------------------------------------------------------------------------|------------|
| <p>P10. Have you seen or heard of this symbol before? <b>Show prompt card with AMFm logo</b></p> <p>1 = Yes<br/> 0 = No <b>go to P13</b><br/> 8 = Don't know <b>go to P13</b></p>                                                                                                                                                                                                                                                                                                                                                                                                                                                                                                                                                                                                                                                                                                                                                                                                                                             | <p>[ ]</p> |
| <p>P11. Where have you seen or heard of this symbol before? <b>Do not read list. Multiple responses allowed. Repeat prompt “anywhere else” until no more suggestions are provided</b></p> <p>1 = response mentioned<br/> 0 = response not mentioned</p> <p>I. On malaria medicine packaging [ ]</p> <p>II. On medicine packaging [ ]</p> <p>III. On posters [ ]</p> <p>IV. On billboards [ ]</p> <p>V. On TV/radio [ ]</p> <p>VI. On a prescription [ ]</p> <p>VII. In newspapers/magazines [ ]</p> <p>VIII. In pharmacies/ drug shops [ ]</p> <p>IX. In private clinics [ ]</p> <p>X. In public health facilities [ ]</p> <p>XI. In training [ ]</p> <p>XII. From a supplier [ ]</p> <p>XIII. From a public event [ ]</p> <p>XIV. From a local leader [ ]</p> <p>XV. From a friend/family member [ ]</p> <p>XVI. On the internet [ ]</p> <p>XVII. Brochures/Pamphlets [ ]</p> <p>XVIII. Medical/Pharmacology books [ ]</p> <p>XIX. Don't Know [ ]</p> <p>XX. Other (<b>specify</b>) [ ]</p> <p>[ ]</p> <p>[ ]</p> <p>[ ]</p> |            |

P12. What does this symbol mean to you? ***Do not read list. Multiple responses allowed. Repeat prompt “anything else” until no more suggestions are provided***

1 = response mentioned  
0 = response not mentioned

- |       |                                    |                          |
|-------|------------------------------------|--------------------------|
| I.    | Effective/quality antimalarial     | <input type="checkbox"/> |
| II.   | Affordable antimalarial            | <input type="checkbox"/> |
| III.  | An antimalarial in high demand     | <input type="checkbox"/> |
| IV.   | Effective/quality medicine         | <input type="checkbox"/> |
| V.    | Affordable medicine                | <input type="checkbox"/> |
| VI.   | A medicine in high demand          | <input type="checkbox"/> |
| VII.  | It means nothing                   | <input type="checkbox"/> |
| VIII. | Artemisinin Combined Therapy (ACT) | <input type="checkbox"/> |
| IX.   | Recommended treatment              | <input type="checkbox"/> |
| X.    | Subsidized medicine                | <input type="checkbox"/> |
| XI.   | I don't know what it means         | <input type="checkbox"/> |
| XII.  | Other ( <i>specify</i> )           | <input type="checkbox"/> |

[\_\_\_\_\_]

[\_\_\_\_\_]

[\_\_\_\_\_]

**P13. In your opinion, for treating uncomplicated malaria in adults, what is the most effective antimalarial product of all of those available on the market? Looking for either generic name or brand name. Ask the provider to show you the medicine if it is in stock.**

|                                        |                                                              |                                                                                                                                                                                                                           |
|----------------------------------------|--------------------------------------------------------------|---------------------------------------------------------------------------------------------------------------------------------------------------------------------------------------------------------------------------|
| <b>Generic name</b><br>98 = Don't know | <b>Brand name</b><br>995 = No preference<br>998 = Don't know | <b>Dosage form</b><br>01 = Tablet<br>02 = Suppository<br>03 = Syrup<br>04 = Suspension<br>05 = Liquid injectable<br><br>06 = Powder injectable<br>07 = Granule<br>96 = Other ( <b><i>specify</i></b> )<br>98 = Don't know |
| [ ][ ]                                 |                                                              | [ ][ ]                                                                                                                                                                                                                    |
| Do not write here<br>[ ][ ]            | [ ][ ][ ]                                                    | If "96" specify _____                                                                                                                                                                                                     |

P14. In your opinion, for treating **uncomplicated** malaria in **children under five years of age**, what is the **most effective** antimalarial product of all of those available on the market? **Looking for either generic name or brand name. Ask the provider to show you the medicine if it is in stock.**

|                                                                                                                                                                                                                                                                                                                                   |                                                                                                                                                                                                                                                                                                                                                                                                                        |                                                                                                                                                                                                                                                                                                                                   |
|-----------------------------------------------------------------------------------------------------------------------------------------------------------------------------------------------------------------------------------------------------------------------------------------------------------------------------------|------------------------------------------------------------------------------------------------------------------------------------------------------------------------------------------------------------------------------------------------------------------------------------------------------------------------------------------------------------------------------------------------------------------------|-----------------------------------------------------------------------------------------------------------------------------------------------------------------------------------------------------------------------------------------------------------------------------------------------------------------------------------|
| <b>Generic name</b><br>98 = Don't know                                                                                                                                                                                                                                                                                            | <b>Brand name</b><br>995 = No preference<br>998 = Don't know                                                                                                                                                                                                                                                                                                                                                           | <b>Dosage form</b><br>01 = Tablet<br>02 = Suppository<br>03 = Syrup<br>04 = Suspension<br>05 = Liquid injectable<br>06 = Powder injectable<br>07 = Granule<br>96 = Other ( <b><i>specify</i></b> )<br>98 = Don't know                                                                                                             |
| <div style="border: 1px solid black; width: 100px; height: 100px; margin: 0 auto; display: flex; align-items: center; justify-content: center;"> <div style="border: 1px solid black; width: 40px; height: 20px; margin: 2px;"></div> <div style="border: 1px solid black; width: 40px; height: 20px; margin: 2px;"></div> </div> |                                                                                                                                                                                                                                                                                                                                                                                                                        | <div style="border: 1px solid black; width: 100px; height: 100px; margin: 0 auto; display: flex; align-items: center; justify-content: center;"> <div style="border: 1px solid black; width: 40px; height: 20px; margin: 2px;"></div> <div style="border: 1px solid black; width: 40px; height: 20px; margin: 2px;"></div> </div> |
| <div style="background-color: #cccccc; padding: 5px; text-align: center;"> Do not write here<br/> <div style="border: 1px solid black; width: 40px; height: 20px; margin: 2px;"></div> <div style="border: 1px solid black; width: 40px; height: 20px; margin: 2px;"></div> </div>                                                | <div style="border: 1px solid black; width: 100px; height: 100px; margin: 0 auto; display: flex; align-items: center; justify-content: center;"> <div style="border: 1px solid black; width: 40px; height: 20px; margin: 2px;"></div> <div style="border: 1px solid black; width: 40px; height: 20px; margin: 2px;"></div> <div style="border: 1px solid black; width: 40px; height: 20px; margin: 2px;"></div> </div> | <i>If "96" specify</i> _____                                                                                                                                                                                                                                                                                                      |

|                                                                                                                                                                                                                                                                                                                                                                                                                                                                                                                                                                                                                                                                                                                                                                                                                                                                                                                                                                                                                                                                                              |               |
|----------------------------------------------------------------------------------------------------------------------------------------------------------------------------------------------------------------------------------------------------------------------------------------------------------------------------------------------------------------------------------------------------------------------------------------------------------------------------------------------------------------------------------------------------------------------------------------------------------------------------------------------------------------------------------------------------------------------------------------------------------------------------------------------------------------------------------------------------------------------------------------------------------------------------------------------------------------------------------------------------------------------------------------------------------------------------------------------|---------------|
| <p>P15. Please name the first line medicine recommended by the government to treat uncomplicated malaria fever. <b>Do not read list. Only one response allowed.</b></p> <p>01 = Artemether Lumefantrine (AL) <b>go to P17</b></p> <p>02 = Amodiaquine</p> <p>03 = Artemether</p> <p>04 = Artemisinin</p> <p>05 = Artesunate</p> <p>06 = Artesunate Amodiaquine</p> <p>07 = Chloroquine</p> <p>08 = Dihydroartemisinin Piperazine</p> <p>09 = Halofantrine</p> <p>10 = Mefloquine</p> <p>11 = Quinine</p> <p>12 = Sulfadoxine Pyrimethamine (SP)</p> <p>96 = Other (<b>specify</b>): [_____]</p> <p>98 = Don't know</p>                                                                                                                                                                                                                                                                                                                                                                                                                                                                       | <p>[ ][ ]</p> |
| <p>P16. Have you ever heard of Artemether Lumefantrine?</p> <p>1 = Yes</p> <p>0 = No</p> <p>8 = Don't know</p>                                                                                                                                                                                                                                                                                                                                                                                                                                                                                                                                                                                                                                                                                                                                                                                                                                                                                                                                                                               | <p>[ ]</p>    |
| <p>P17. Can you please show us the full range of antimalarials that you currently have in stock? Do you currently have any of the following? <b>Prompt entire list using antimalarial prompt card; No response to be recorded.</b></p> <ul style="list-style-type: none"> <li>• Artemether Lumefantrine such as Coartem, Lonart, Artefan</li> <li>• Artemisinin combination therapies, such as Duo-Cotexcin, Co-arinate, P-Alaxin</li> <li>• Artemisinin monotherapies, such as Arinate, Artemedine,</li> <li>• Artemether such as Larither, Gvither</li> <li>• SP, such as Metakelfin, Fansidar</li> <li>• Amodiaquine, such as Malaratab, Loquin</li> <li>• Quinine, such as Quinitab, quinimax, Falciquin</li> <li>• Mefloquine, such as Mephaquin, Meflotas, Mequin</li> <li>• Chloroquine, such as Falcin, Maladrin</li> <li>• Syrups or suspensions, such as Falcidin, Amoquin</li> <li>• Injectables, such as Paluther, Larither, Quinine</li> <li>• Granules or powders, such as Artequin Paediatric</li> </ul> <p><b>If the outlet has no antimalarials in stock, go to P23</b></p> |               |

### Section III: Antimalarial Audit Sheets

**Proceed to the drug audit. Different Drug Audit sheets will be used to record the antimalarial information based on the dosage form of the medicine.**

**Separate the antimalarials into two piles:**

- **The first pile should contain all the antimalarials in the form of tablets, suppositories, or granules. Use the Tablets, Suppositories & Granules Drug Audit Sheet to record these.**
- **The second pile should contain all the antimalarials in any form other than tablets, suppositories or granules. Use the Non-Tablet Drug Audit Sheet to record these.**

**Attach additional audit sheets to the end of the questionnaire, if necessary.**

**Number each drug audited sequentially by assigning a Product Number, and number each completed audit sheet sequentially in the space provided at the bottom of each page**

## OUTLET ID: [ ][ ]-[ ][ ][ ]-[ ][ ][ ][ ]-[ ][ ][ ][ ]-[ ][ ][ ][ ]

|                                                                                                                                                                                                     |                                                                                                             |                                                                                 |                                                                                                                                                                                                                                                                                                                                                                                                                                                  |                                                                                                                                                                                                                           |                                                                                                                                                                                                                                                        |               |                 |                                |
|-----------------------------------------------------------------------------------------------------------------------------------------------------------------------------------------------------|-------------------------------------------------------------------------------------------------------------|---------------------------------------------------------------------------------|--------------------------------------------------------------------------------------------------------------------------------------------------------------------------------------------------------------------------------------------------------------------------------------------------------------------------------------------------------------------------------------------------------------------------------------------------|---------------------------------------------------------------------------------------------------------------------------------------------------------------------------------------------------------------------------|--------------------------------------------------------------------------------------------------------------------------------------------------------------------------------------------------------------------------------------------------------|---------------|-----------------|--------------------------------|
| Product number<br><br>[ ][ ][ ]                                                                                                                                                                     | [ ][ ]                                                                                                      | 1. Generic name                                                                 | 2. Strength                                                                                                                                                                                                                                                                                                                                                                                                                                      | 2a. Is this the base?                                                                                                                                                                                                     | 3. Dosage form                                                                                                                                                                                                                                         | 4. Brand name | 5. Manufacturer | 6. Country of manufacture      |
|                                                                                                                                                                                                     | [ ][ ]                                                                                                      |                                                                                 | [ ][ ][ ] . [ ][ ] mg                                                                                                                                                                                                                                                                                                                                                                                                                            | [ ][ ]<br>1 = Yes                                                                                                                                                                                                         | 1 = Tablet                                                                                                                                                                                                                                             |               |                 |                                |
|                                                                                                                                                                                                     | [ ][ ]                                                                                                      |                                                                                 | [ ][ ][ ] . [ ][ ] mg                                                                                                                                                                                                                                                                                                                                                                                                                            | [ ][ ]<br>0 = No                                                                                                                                                                                                          | 2 = Suppository                                                                                                                                                                                                                                        |               |                 |                                |
|                                                                                                                                                                                                     | [ ][ ]                                                                                                      |                                                                                 | [ ][ ][ ] . [ ][ ] mg                                                                                                                                                                                                                                                                                                                                                                                                                            | [ ][ ]<br>8 = Don't know                                                                                                                                                                                                  | 3 = Granule                                                                                                                                                                                                                                            |               |                 |                                |
|                                                                                                                                                                                                     | [ ][ ]                                                                                                      | Do not write here                                                               |                                                                                                                                                                                                                                                                                                                                                                                                                                                  | If no, specify excipient:<br>[ ][ ][ ][ ]                                                                                                                                                                                 | [ ][ ]                                                                                                                                                                                                                                                 |               |                 | [ ][ ][ ]<br>Do not write here |
| 7. Package size<br>(Fill in number)<br><br>There are a total of [ ][ ][ ][ ] tablets / suppositories / granule packs in each (select package type):<br><br>1 = Package<br>2 = Pot/tin<br><br>[ ][ ] | 8. Is this product a fixed-dose combination (FDC)?<br><br>1 = Yes<br>0 = No<br>8 = Don't know<br><br>[ ][ ] | 9. Does this product have the AMFm logo?<br><br>1 = Yes<br>0 = No<br><br>[ ][ ] | 10. Amount sold/distributed in the last 7 days to individual consumers (Record # of packages/tins described in Q7 OR record the total # of tablets/suppositories/granule packs sold)<br><br>This outlet sold [ ][ ][ ][ ] packages in the <u>last 7 days</u><br><br>OR<br><br>This outlet sold [ ][ ][ ][ ] tablets/suppositories or granule packs in the <u>last 7 days</u><br><br><b>Not applicable = 995; Refused = 997; Don't know = 998</b> | 11. Retail selling price<br><br>[ ][ ][ ][ ][ ] tablets, suppositories or granule packs cost an individual customer<br><br>[ ][ ][ ][ ][ ][ ] KSH<br><br><b>Free = 00000;<br/>Refused = 99997;<br/>Don't know = 99998</b> | 12. Wholesale purchase price For the outlet's most recent wholesale purchase<br><br>[ ][ ][ ][ ][ ] tablets, suppositories or granule packs cost<br><br>[ ][ ][ ][ ][ ][ ] KSH<br><br><b>Free = 00000;<br/>Refused = 99997;<br/>Don't know = 99998</b> | 13. Comments  |                 |                                |

|                                                                                                                                                                                              |                           |                                                                                                      |                                   |                                                                          |                                                                                                              |                                                                                                                                                                                                                                                                                                                                                                                                                                            |                                                                       |                                                                                                                                                                                                                    |               |                                                                                                                                                                                                                                                 |                 |              |                                                                 |  |
|----------------------------------------------------------------------------------------------------------------------------------------------------------------------------------------------|---------------------------|------------------------------------------------------------------------------------------------------|-----------------------------------|--------------------------------------------------------------------------|--------------------------------------------------------------------------------------------------------------|--------------------------------------------------------------------------------------------------------------------------------------------------------------------------------------------------------------------------------------------------------------------------------------------------------------------------------------------------------------------------------------------------------------------------------------------|-----------------------------------------------------------------------|--------------------------------------------------------------------------------------------------------------------------------------------------------------------------------------------------------------------|---------------|-------------------------------------------------------------------------------------------------------------------------------------------------------------------------------------------------------------------------------------------------|-----------------|--------------|-----------------------------------------------------------------|--|
| Product number<br><br>[ ][ ][ ]                                                                                                                                                              | 1. Generic name<br>[ ][ ] |                                                                                                      | 2. Strength<br>[ ][ ][ ].[ ][ ]mg |                                                                          | 2a. Is this the base?<br>[ ]<br>1 = Yes<br>[ ] 0 = No<br>[ ] 8 = Don't know<br>If no, specify excipient: [ ] |                                                                                                                                                                                                                                                                                                                                                                                                                                            | 3. Dosage form<br>1 = Tablet<br>2 = Suppository<br>3 = Granule<br>[ ] |                                                                                                                                                                                                                    | 4. Brand name |                                                                                                                                                                                                                                                 | 5. Manufacturer |              | 6. Country of manufacture<br><br>[ ][ ][ ]<br>Do not write here |  |
|                                                                                                                                                                                              | [ ][ ]                    |                                                                                                      | [ ][ ][ ].[ ][ ]mg                |                                                                          |                                                                                                              |                                                                                                                                                                                                                                                                                                                                                                                                                                            |                                                                       |                                                                                                                                                                                                                    |               |                                                                                                                                                                                                                                                 |                 |              |                                                                 |  |
|                                                                                                                                                                                              | [ ][ ]                    |                                                                                                      | [ ][ ][ ].[ ][ ]mg                |                                                                          |                                                                                                              |                                                                                                                                                                                                                                                                                                                                                                                                                                            |                                                                       |                                                                                                                                                                                                                    |               |                                                                                                                                                                                                                                                 |                 |              |                                                                 |  |
|                                                                                                                                                                                              | [ ][ ]                    |                                                                                                      | [ ][ ][ ].[ ][ ]mg                |                                                                          |                                                                                                              |                                                                                                                                                                                                                                                                                                                                                                                                                                            |                                                                       |                                                                                                                                                                                                                    |               |                                                                                                                                                                                                                                                 |                 |              |                                                                 |  |
| 7. Package size<br>(Fill in number)<br><br>There are a total of [ ][ ][ ][ ] tablets / suppositories / granule packs in each (select package type):<br><br>1 = Package<br>2 = Pot/tin<br>[ ] |                           | 8. Is this product a fixed-dose combination (FDC)?<br><br>1 = Yes<br>0 = No<br>8 = Don't know<br>[ ] |                                   | 9. Does this product have the AMFm logo?<br><br>1 = Yes<br>0 = No<br>[ ] |                                                                                                              | 10. Amount sold/distributed in the last 7 days to individual consumers (Record # of packages/tins described in Q7 OR record the total # of tablets/suppositories/granule packs sold)<br><br>This outlet sold [ ][ ][ ] packages in the <u>last 7 days</u><br><br>OR<br><br>This outlet sold [ ][ ][ ] tablets/suppositories or granule packs in the <u>last 7 days</u><br><br><b>Not applicable = 995; Refused = 997; Don't know = 998</b> |                                                                       | 11. Retail selling price<br><br>[ ][ ][ ][ ] tablets, suppositories or granule packs cost an individual customer<br><br>[ ][ ][ ][ ][ ]KSH<br><br><b>Free = 00000;<br/>Refused = 99997;<br/>Don't know = 99998</b> |               | 12. Wholesale purchase price For the outlet's most recent wholesale purchase<br><br>[ ][ ][ ][ ] tablets, suppositories or granule packs cost<br><br>[ ][ ][ ][ ][ ]KSH<br><br><b>Free = 00000;<br/>Refused = 99997;<br/>Don't know = 99998</b> |                 | 13. Comments |                                                                 |  |

**PUT ASIDE ALL QAACTs**

**PUT ASIDE ALL QAACTs**

**PUT ASIDE ALL QAACTs**

Tablet, Suppository and Granule Audit Sheet [ ] of [ ]

## OUTLET ID: [ 1 | 1H | 1 | 1H | 1 | 1 ]-[ 1 | 1 | 1 | 1H | 1 | 1 ]

|                                                                                                                                                                                                  |                                                                                                          |                                                                              |                                                                                                                                                                                                                                                                                                                                                                                                                                            |                                         |                                                                                                                                                                                                                    |                                                                                                                                                                                                                                                 |                 |                             |
|--------------------------------------------------------------------------------------------------------------------------------------------------------------------------------------------------|----------------------------------------------------------------------------------------------------------|------------------------------------------------------------------------------|--------------------------------------------------------------------------------------------------------------------------------------------------------------------------------------------------------------------------------------------------------------------------------------------------------------------------------------------------------------------------------------------------------------------------------------------|-----------------------------------------|--------------------------------------------------------------------------------------------------------------------------------------------------------------------------------------------------------------------|-------------------------------------------------------------------------------------------------------------------------------------------------------------------------------------------------------------------------------------------------|-----------------|-----------------------------|
| Product number<br><br>[ ][ ][ ]                                                                                                                                                                  | [ ][ ]                                                                                                   | 1. Generic name                                                              | 2. Strength                                                                                                                                                                                                                                                                                                                                                                                                                                | 2a. Is this the base?                   | 3. Dosage form                                                                                                                                                                                                     | 4. Brand name                                                                                                                                                                                                                                   | 5. Manufacturer | 6. Country of manufacture   |
|                                                                                                                                                                                                  | [ ][ ]                                                                                                   |                                                                              | [ ][ ][ ].[ ][ ]mg                                                                                                                                                                                                                                                                                                                                                                                                                         | <input type="checkbox"/> 1 = Yes        | 1 = Tablet                                                                                                                                                                                                         |                                                                                                                                                                                                                                                 |                 |                             |
|                                                                                                                                                                                                  | [ ][ ]                                                                                                   |                                                                              | [ ][ ][ ].[ ][ ]mg                                                                                                                                                                                                                                                                                                                                                                                                                         | <input type="checkbox"/> 0 = No         | 2 = Suppository                                                                                                                                                                                                    |                                                                                                                                                                                                                                                 |                 |                             |
|                                                                                                                                                                                                  | [ ][ ]                                                                                                   |                                                                              | [ ][ ][ ].[ ][ ]mg                                                                                                                                                                                                                                                                                                                                                                                                                         | <input type="checkbox"/> 8 = Don't know | 3 = Granule                                                                                                                                                                                                        |                                                                                                                                                                                                                                                 |                 |                             |
|                                                                                                                                                                                                  | [ ][ ]<br>Do not write here                                                                              |                                                                              |                                                                                                                                                                                                                                                                                                                                                                                                                                            | If no, specify excipient:<br>[ ]        | [ ]                                                                                                                                                                                                                |                                                                                                                                                                                                                                                 |                 | [ ][ ]<br>Do not write here |
| 7. Package size<br>(Fill in number)<br><br>There are a total of [ ][ ][ ][ ] tablets / suppositories / granule packs in each (select package type):<br><br>1 = Package<br>2 = Pot/tin<br><br>[ ] | 8. Is this product a fixed-dose combination (FDC)?<br><br>1 = Yes<br>0 = No<br>8 = Don't know<br><br>[ ] | 9. Does this product have the AMFm logo?<br><br>1 = Yes<br>0 = No<br><br>[ ] | 10. Amount sold/distributed in the last 7 days to individual consumers (Record # of packages/tins described in Q7 OR record the total # of tablets/suppositories/granule packs sold)<br><br>This outlet sold [ ][ ][ ] packages in the <u>last 7 days</u><br><br>OR<br><br>This outlet sold [ ][ ][ ] tablets/suppositories or granule packs in the <u>last 7 days</u><br><br><b>Not applicable = 995; Refused = 997; Don't know = 998</b> |                                         | 11. Retail selling price<br><br>[ ][ ][ ][ ] tablets, suppositories or granule packs cost an individual customer<br><br>[ ][ ][ ][ ][ ]KSH<br><br><b>Free = 00000;<br/>Refused = 99997;<br/>Don't know = 99998</b> | 12. Wholesale purchase price For the outlet's most recent wholesale purchase<br><br>[ ][ ][ ][ ] tablets, suppositories or granule packs cost<br><br>[ ][ ][ ][ ][ ]KSH<br><br><b>Free = 00000;<br/>Refused = 99997;<br/>Don't know = 99998</b> | 13. Comments    |                             |

**PUT ASIDE ALL QAACTs**

Tablet, Suppository and Granule Audit Sheet [ ] of [ ]



## OUTLET ID: [ ][ ]-[ ][ ][ ]-[ ][ ][ ][ ]-[ ][ ][ ][ ][ ]-[ ][ ][ ][ ][ ]

|                                                                                                                                                                                                  |                                                                                                          |                                                                              |                                                                                                                                                                                                                                                                                                                                                                                                                                            |                                                                                                                                                                                                                    |                                                                                                                                                                                                                                                 |               |                 |                                |
|--------------------------------------------------------------------------------------------------------------------------------------------------------------------------------------------------|----------------------------------------------------------------------------------------------------------|------------------------------------------------------------------------------|--------------------------------------------------------------------------------------------------------------------------------------------------------------------------------------------------------------------------------------------------------------------------------------------------------------------------------------------------------------------------------------------------------------------------------------------|--------------------------------------------------------------------------------------------------------------------------------------------------------------------------------------------------------------------|-------------------------------------------------------------------------------------------------------------------------------------------------------------------------------------------------------------------------------------------------|---------------|-----------------|--------------------------------|
| Product number<br><br>[ ][ ][ ]                                                                                                                                                                  | [ ][ ]                                                                                                   | 1. Generic name                                                              | 2. Strength                                                                                                                                                                                                                                                                                                                                                                                                                                | 2a. Is this the base?                                                                                                                                                                                              | 3. Dosage form                                                                                                                                                                                                                                  | 4. Brand name | 5. Manufacturer | 6. Country of manufacture      |
|                                                                                                                                                                                                  | [ ][ ]                                                                                                   |                                                                              | [ ][ ][ ][ ].[ ][ ]mg                                                                                                                                                                                                                                                                                                                                                                                                                      | [ ]<br>1 = Yes                                                                                                                                                                                                     | 1 = Tablet                                                                                                                                                                                                                                      |               |                 |                                |
|                                                                                                                                                                                                  | [ ][ ]                                                                                                   |                                                                              | [ ][ ][ ][ ].[ ][ ]mg                                                                                                                                                                                                                                                                                                                                                                                                                      | [ ]<br>0 = No                                                                                                                                                                                                      | 2 = Suppository                                                                                                                                                                                                                                 |               |                 |                                |
|                                                                                                                                                                                                  | [ ][ ]                                                                                                   |                                                                              | [ ][ ][ ][ ].[ ][ ]mg                                                                                                                                                                                                                                                                                                                                                                                                                      | [ ]<br>8 = Don't know                                                                                                                                                                                              | 3 = Granule                                                                                                                                                                                                                                     |               |                 |                                |
|                                                                                                                                                                                                  | [ ][ ]                                                                                                   | Do not write here                                                            |                                                                                                                                                                                                                                                                                                                                                                                                                                            | If no, specify excipient:<br>[ ]                                                                                                                                                                                   | [ ]                                                                                                                                                                                                                                             |               |                 | [ ][ ][ ]<br>Do not write here |
| 7. Package size<br>(Fill in number)<br><br>There are a total of [ ][ ][ ][ ] tablets / suppositories / granule packs in each (select package type):<br><br>1 = Package<br>2 = Pot/tin<br><br>[ ] | 8. Is this product a fixed-dose combination (FDC)?<br><br>1 = Yes<br>0 = No<br>8 = Don't know<br><br>[ ] | 9. Does this product have the AMFm logo?<br><br>1 = Yes<br>0 = No<br><br>[ ] | 10. Amount sold/distributed in the last 7 days to individual consumers (Record # of packages/tins described in Q7 OR record the total # of tablets/suppositories/granule packs sold)<br><br>This outlet sold [ ][ ][ ] packages in the <u>last 7 days</u><br><br>OR<br><br>This outlet sold [ ][ ][ ] tablets/suppositories or granule packs in the <u>last 7 days</u><br><br><b>Not applicable = 995; Refused = 997; Don't know = 998</b> | 11. Retail selling price<br><br>[ ][ ][ ][ ] tablets, suppositories or granule packs cost an individual customer<br><br>[ ][ ][ ][ ][ ]KSH<br><br><b>Free = 00000;<br/>Refused = 99997;<br/>Don't know = 99998</b> | 12. Wholesale purchase price For the outlet's most recent wholesale purchase<br><br>[ ][ ][ ][ ] tablets, suppositories or granule packs cost<br><br>[ ][ ][ ][ ][ ]KSH<br><br><b>Free = 00000;<br/>Refused = 99997;<br/>Don't know = 99998</b> | 13. Comments  |                 |                                |

**PUT ASIDE ALL QAACTs**

Tablet, Suppository and Granule Audit Sheet [ ] of [ ]

**TABLET, SUPPOSITORY & GRANULE DRUG AUDIT SHEET (TSG)**

OUTLET ID: [ ][ ]-[ ][ ][ ][ ]-[ ][ ][ ][ ]-[ ][ ][ ][ ]

|                                                                                                                                                                                                  |        |                                                                                                          |                                                                              |                                                                                                                                                                                                                                                                                                                                                                                                                                            |                 |                                                                                                                                                                                                                    |                                                                                                                                                                                                                                                 |                                |
|--------------------------------------------------------------------------------------------------------------------------------------------------------------------------------------------------|--------|----------------------------------------------------------------------------------------------------------|------------------------------------------------------------------------------|--------------------------------------------------------------------------------------------------------------------------------------------------------------------------------------------------------------------------------------------------------------------------------------------------------------------------------------------------------------------------------------------------------------------------------------------|-----------------|--------------------------------------------------------------------------------------------------------------------------------------------------------------------------------------------------------------------|-------------------------------------------------------------------------------------------------------------------------------------------------------------------------------------------------------------------------------------------------|--------------------------------|
| Product number<br><br>[ ][ ][ ]                                                                                                                                                                  | [ ][ ] | 1. Generic name                                                                                          | 2. Strength                                                                  | 2a. Is this the base?                                                                                                                                                                                                                                                                                                                                                                                                                      | 3. Dosage form  | 4. Brand name                                                                                                                                                                                                      | 5. Manufacturer                                                                                                                                                                                                                                 | 6. Country of manufacture      |
|                                                                                                                                                                                                  | [ ][ ] |                                                                                                          | [ ][ ][ ]:[ ][ ]mg                                                           | [ ]<br>1 = Yes                                                                                                                                                                                                                                                                                                                                                                                                                             | 1 = Tablet      |                                                                                                                                                                                                                    |                                                                                                                                                                                                                                                 |                                |
|                                                                                                                                                                                                  | [ ][ ] |                                                                                                          | [ ][ ][ ]:[ ][ ]mg                                                           | [ ]<br>0 = No                                                                                                                                                                                                                                                                                                                                                                                                                              | 2 = Suppository |                                                                                                                                                                                                                    |                                                                                                                                                                                                                                                 |                                |
|                                                                                                                                                                                                  | [ ][ ] |                                                                                                          | [ ][ ][ ]:[ ][ ]mg                                                           | [ ]<br>8 = Don't know                                                                                                                                                                                                                                                                                                                                                                                                                      | 3 = Granule     |                                                                                                                                                                                                                    |                                                                                                                                                                                                                                                 |                                |
|                                                                                                                                                                                                  | [ ][ ] | Do not write here                                                                                        |                                                                              | If no, specify excipient:<br>[ ]                                                                                                                                                                                                                                                                                                                                                                                                           | [ ]             |                                                                                                                                                                                                                    |                                                                                                                                                                                                                                                 | [ ][ ][ ]<br>Do not write here |
| 7. Package size<br>(Fill in number)<br><br>There are a total of [ ][ ][ ][ ] tablets / suppositories / granule packs in each (select package type):<br><br>1 = Package<br>2 = Pot/tin<br><br>[ ] |        | 8. Is this product a fixed-dose combination (FDC)?<br><br>1 = Yes<br>0 = No<br>8 = Don't know<br><br>[ ] | 9. Does this product have the AMFm logo?<br><br>1 = Yes<br>0 = No<br><br>[ ] | 10. Amount sold/distributed in the last 7 days to individual consumers (Record # of packages/tins described in Q7 OR record the total # of tablets/suppositories/granule packs sold)<br><br>This outlet sold [ ][ ][ ] packages in the <u>last 7 days</u><br><br>OR<br><br>This outlet sold [ ][ ][ ] tablets/suppositories or granule packs in the <u>last 7 days</u><br><br><b>Not applicable = 995; Refused = 997; Don't know = 998</b> |                 | 11. Retail selling price<br><br>[ ][ ][ ][ ] tablets, suppositories or granule packs cost an individual customer<br><br>[ ][ ][ ][ ][ ]KSH<br><br><b>Free = 00000;<br/>Refused = 99997;<br/>Don't know = 99998</b> | 12. Wholesale purchase price For the outlet's most recent wholesale purchase<br><br>[ ][ ][ ][ ] tablets, suppositories or granule packs cost<br><br>[ ][ ][ ][ ][ ]KSH<br><br><b>Free = 00000;<br/>Refused = 99997;<br/>Don't know = 99998</b> | 13. Comments                   |

|                                                                                                                                                                                                  |        |                                                                                                          |                                                                              |                                                                                                                                                                                                                                                                                                                                                                                                                                            |                 |                                                                                                                                                                                                                    |                                                                                                                                                                                                                                                 |                                |
|--------------------------------------------------------------------------------------------------------------------------------------------------------------------------------------------------|--------|----------------------------------------------------------------------------------------------------------|------------------------------------------------------------------------------|--------------------------------------------------------------------------------------------------------------------------------------------------------------------------------------------------------------------------------------------------------------------------------------------------------------------------------------------------------------------------------------------------------------------------------------------|-----------------|--------------------------------------------------------------------------------------------------------------------------------------------------------------------------------------------------------------------|-------------------------------------------------------------------------------------------------------------------------------------------------------------------------------------------------------------------------------------------------|--------------------------------|
| Product number<br><br>[ ][ ][ ]                                                                                                                                                                  | [ ][ ] | 1. Generic name                                                                                          | 2. Strength                                                                  | 2a. Is this the base?                                                                                                                                                                                                                                                                                                                                                                                                                      | 3. Dosage form  | 4. Brand name                                                                                                                                                                                                      | 5. Manufacturer                                                                                                                                                                                                                                 | 6. Country of manufacture      |
|                                                                                                                                                                                                  | [ ][ ] |                                                                                                          | [ ][ ][ ]:[ ][ ]mg                                                           | [ ]<br>1 = Yes                                                                                                                                                                                                                                                                                                                                                                                                                             | 1 = Tablet      |                                                                                                                                                                                                                    |                                                                                                                                                                                                                                                 |                                |
|                                                                                                                                                                                                  | [ ][ ] |                                                                                                          | [ ][ ][ ]:[ ][ ]mg                                                           | [ ]<br>0 = No                                                                                                                                                                                                                                                                                                                                                                                                                              | 2 = Suppository |                                                                                                                                                                                                                    |                                                                                                                                                                                                                                                 |                                |
|                                                                                                                                                                                                  | [ ][ ] |                                                                                                          | [ ][ ][ ]:[ ][ ]mg                                                           | [ ]<br>8 = Don't know                                                                                                                                                                                                                                                                                                                                                                                                                      | 3 = Granule     |                                                                                                                                                                                                                    |                                                                                                                                                                                                                                                 |                                |
|                                                                                                                                                                                                  | [ ][ ] | Do not write here                                                                                        |                                                                              | If no, specify excipient:<br>[ ]                                                                                                                                                                                                                                                                                                                                                                                                           | [ ]             |                                                                                                                                                                                                                    |                                                                                                                                                                                                                                                 | [ ][ ][ ]<br>Do not write here |
| 7. Package size<br>(Fill in number)<br><br>There are a total of [ ][ ][ ][ ] tablets / suppositories / granule packs in each (select package type):<br><br>1 = Package<br>2 = Pot/tin<br><br>[ ] |        | 8. Is this product a fixed-dose combination (FDC)?<br><br>1 = Yes<br>0 = No<br>8 = Don't know<br><br>[ ] | 9. Does this product have the AMFm logo?<br><br>1 = Yes<br>0 = No<br><br>[ ] | 10. Amount sold/distributed in the last 7 days to individual consumers (Record # of packages/tins described in Q7 OR record the total # of tablets/suppositories/granule packs sold)<br><br>This outlet sold [ ][ ][ ] packages in the <u>last 7 days</u><br><br>OR<br><br>This outlet sold [ ][ ][ ] tablets/suppositories or granule packs in the <u>last 7 days</u><br><br><b>Not applicable = 995; Refused = 997; Don't know = 998</b> |                 | 11. Retail selling price<br><br>[ ][ ][ ][ ] tablets, suppositories or granule packs cost an individual customer<br><br>[ ][ ][ ][ ][ ]KSH<br><br><b>Free = 00000;<br/>Refused = 99997;<br/>Don't know = 99998</b> | 12. Wholesale purchase price For the outlet's most recent wholesale purchase<br><br>[ ][ ][ ][ ] tablets, suppositories or granule packs cost<br><br>[ ][ ][ ][ ][ ]KSH<br><br><b>Free = 00000;<br/>Refused = 99997;<br/>Don't know = 99998</b> | 13. Comments                   |

PUT ASIDE ALL QAACts

PUT ASIDE ALL QAACts

PUT ASIDE ALL QAACts

Outlet ID: [ ][ ]-[ ][ ][ ][ ]-[ ][ ][ ][ ]-[ ][ ][ ][ ][ ]-[ ][ ][ ][ ]

|                                                                        |                                                                                                                                                                  |                                                                                                                                                                            |                                                                                                                                                                                                                      |                                                                                                                                                                                                                        |                                                                                                                                                                                                                                                                 |                        |
|------------------------------------------------------------------------|------------------------------------------------------------------------------------------------------------------------------------------------------------------|----------------------------------------------------------------------------------------------------------------------------------------------------------------------------|----------------------------------------------------------------------------------------------------------------------------------------------------------------------------------------------------------------------|------------------------------------------------------------------------------------------------------------------------------------------------------------------------------------------------------------------------|-----------------------------------------------------------------------------------------------------------------------------------------------------------------------------------------------------------------------------------------------------------------|------------------------|
| <b>Product number</b>                                                  | <b>1. Generic name</b>                                                                                                                                           | <b>2. Strength</b>                                                                                                                                                         | <b>2a. Is this the base?</b>                                                                                                                                                                                         | <b>3. Dosage form</b>                                                                                                                                                                                                  | <b>4. Brand name</b>                                                                                                                                                                                                                                            | <b>5. Manufacturer</b> |
| [ ][ ]<br>[ ][ ]<br>[ ][ ]                                             | [ ][ ]<br>[ ][ ]<br>[ ][ ]<br><div style="text-align: center;">[ ][ ]<br/>Do not write here</div>                                                                | [ ][ ][ ][ ].[ ][ ]mg / [ ][ ][ ][ ]mL<br>[ ][ ][ ][ ].[ ][ ]mg / [ ][ ][ ][ ]mL<br>[ ][ ][ ][ ].[ ][ ]mg / [ ][ ][ ][ ]mL<br>(Note: no mL recorded for powder injections) | [ ]      1 = Yes<br>[ ]      0 = No<br>[ ]      8 = Don't know<br><br>If no, specify excipient<br>[ ][ ][ ][ ][ ]                                                                                                    | 1 = Syrup<br>2 = Suspension<br>3 = Liquid inj.<br>4 = Powder inj.<br>6 = Other<br>(specify)<br>[ ]                                                                                                                     |                                                                                                                                                                                                                                                                 |                        |
| <b>6. Country of manufacture</b>                                       | <b>7. Package size (Fill in number)</b><br><br>There are a total of [ ][ ][ ][ ] mL (or mg for powder injections) in each:<br><br>1 = Bottle<br>2 = Ampoule/vial | <b>8. Does this product have the AMFm logo?</b><br><br>1 = Yes<br>0 = No                                                                                                   | <b>9. Amount sold/distributed in the last 7 days to individual consumers</b><br>This outlet sold [ ][ ][ ][ ] bottles, ampoules or vials in the last 7 days<br><br><b>Refused = 9997</b><br><b>Don't know = 9998</b> | <b>10. Retail selling price</b><br>[ ][ ][ ][ ] bottles ampoules or vials cost an individual customer<br><br>[ ][ ][ ][ ][ ][ ]KSH<br><br><b>Free = 00000;</b><br><b>Refused = 99997;</b><br><b>Don't know = 99998</b> | <b>11. Wholesale purchase price</b><br>For the outlet's most recent wholesale purchase:<br><br>[ ][ ][ ][ ][ ] bottles, ampoules or vials cost<br><br>[ ][ ][ ][ ][ ][ ]KSH<br><br><b>Free = 00000;</b><br><b>Refused = 99997;</b><br><b>Don't know = 99998</b> | <b>12. Comments</b>    |
| <div style="text-align: center;">[ ][ ][ ]<br/>Do not write here</div> | <div style="text-align: center;">[ ]</div>                                                                                                                       | <div style="text-align: center;">[ ]</div>                                                                                                                                 |                                                                                                                                                                                                                      |                                                                                                                                                                                                                        |                                                                                                                                                                                                                                                                 |                        |

|                                     |                                                                                                                                                           |                                                                   |                                                                                                                                                                                                                             |                                                                                                                                                                                                                  |                                                                                                                                                                                                                                                       |               |                 |
|-------------------------------------|-----------------------------------------------------------------------------------------------------------------------------------------------------------|-------------------------------------------------------------------|-----------------------------------------------------------------------------------------------------------------------------------------------------------------------------------------------------------------------------|------------------------------------------------------------------------------------------------------------------------------------------------------------------------------------------------------------------|-------------------------------------------------------------------------------------------------------------------------------------------------------------------------------------------------------------------------------------------------------|---------------|-----------------|
| Product number<br><br><br>[ ][ ][ ] | [ ][ ]                                                                                                                                                    | 1. Generic name                                                   | 2. Strength                                                                                                                                                                                                                 | 2a. Is this the base?                                                                                                                                                                                            | 3. Dosage form                                                                                                                                                                                                                                        | 4. Brand name | 5. Manufacturer |
|                                     | [ ][ ]                                                                                                                                                    |                                                                   | [ ][ ][ ][ ].[ ]mg / [ ][ ][ ]mL                                                                                                                                                                                            | [ ] 1 = Yes                                                                                                                                                                                                      | 1 = Syrup                                                                                                                                                                                                                                             |               |                 |
|                                     | [ ][ ]                                                                                                                                                    |                                                                   | [ ][ ][ ][ ].[ ]mg / [ ][ ][ ]mL                                                                                                                                                                                            | [ ] 0 = No                                                                                                                                                                                                       | 2 = Suspension                                                                                                                                                                                                                                        |               |                 |
|                                     | [ ][ ]                                                                                                                                                    |                                                                   | [ ][ ][ ][ ].[ ]mg / [ ][ ][ ]mL<br>(Note: no mL recorded for powder injections)                                                                                                                                            | [ ] 8 = Don't know                                                                                                                                                                                               | 3 = Liquid inj.                                                                                                                                                                                                                                       |               |                 |
|                                     | [ ][ ]<br>Do not write here                                                                                                                               |                                                                   |                                                                                                                                                                                                                             | If no, specify excipient<br>[ ]                                                                                                                                                                                  | 4 = Powder inj.                                                                                                                                                                                                                                       |               |                 |
|                                     |                                                                                                                                                           |                                                                   |                                                                                                                                                                                                                             |                                                                                                                                                                                                                  | 6 = Other<br>(specify)<br>[ ]                                                                                                                                                                                                                         |               |                 |
| 6. Country of manufacture           | 7. Package size (Fill in number)<br><br>There are a total of [ ][ ][ ][ ] mL (or mg for powder injections) in each:<br><br>1 = Bottle<br>2 = Ampoule/vial | 8. Does this product have the AMFm logo?<br><br>1 = Yes<br>0 = No | 9. Amount sold/distributed in the <u>last 7 days</u> to individual consumers<br>This outlet sold [ ][ ][ ][ ] bottles, ampoules or vials in the <u>last 7 days</u><br><br><i>Refused = 9997</i><br><i>Don't know = 9998</i> | 10. Retail selling price<br><br>[ ][ ][ ][ ] bottles ampoules or vials cost an individual customer<br><br>[ ][ ][ ][ ][ ]KSH<br><br><i>Free = 00000;</i><br><i>Refused = 99997;</i><br><i>Don't know = 99998</i> | 11. Wholesale purchase price<br>For the outlet's most recent wholesale purchase:<br><br>[ ][ ][ ][ ][ ] bottles, ampoules or vials cost<br><br>[ ][ ][ ][ ][ ]KSH<br><br><i>Free = 00000;</i><br><i>Refused = 99997;</i><br><i>Don't know = 99998</i> | 12. Comments  |                 |
| [ ][ ][ ]<br>Do not write here      | [ ]                                                                                                                                                       | [ ]                                                               |                                                                                                                                                                                                                             |                                                                                                                                                                                                                  |                                                                                                                                                                                                                                                       |               |                 |

Outlet ID: [ ][ ]-[ ][ ][ ][ ]-[ ][ ][ ][ ]-[ ][ ][ ][ ][ ]-[ ][ ][ ][ ]

|                                                                        |                                                                                                                                                                  |                                                                                                                                                                            |                                                                                                                                                                                                                      |                                                                                                                                                                                                                        |                                                                                                                                                                                                                                                                 |                        |
|------------------------------------------------------------------------|------------------------------------------------------------------------------------------------------------------------------------------------------------------|----------------------------------------------------------------------------------------------------------------------------------------------------------------------------|----------------------------------------------------------------------------------------------------------------------------------------------------------------------------------------------------------------------|------------------------------------------------------------------------------------------------------------------------------------------------------------------------------------------------------------------------|-----------------------------------------------------------------------------------------------------------------------------------------------------------------------------------------------------------------------------------------------------------------|------------------------|
| <b>Product number</b>                                                  | <b>1. Generic name</b>                                                                                                                                           | <b>2. Strength</b>                                                                                                                                                         | <b>2a. Is this the base?</b>                                                                                                                                                                                         | <b>3. Dosage form</b>                                                                                                                                                                                                  | <b>4. Brand name</b>                                                                                                                                                                                                                                            | <b>5. Manufacturer</b> |
| [ ][ ]<br>[ ][ ]<br>[ ][ ]                                             | [ ][ ]<br>[ ][ ]<br>[ ][ ]<br><div style="text-align: center;">[ ][ ]<br/>Do not write here</div>                                                                | [ ][ ][ ][ ].[ ][ ]mg / [ ][ ][ ][ ]mL<br>[ ][ ][ ][ ].[ ][ ]mg / [ ][ ][ ][ ]mL<br>[ ][ ][ ][ ].[ ][ ]mg / [ ][ ][ ][ ]mL<br>(Note: no mL recorded for powder injections) | [ ]      1 = Yes<br>[ ]      0 = No<br>[ ]      8 = Don't know<br><br>If no, specify excipient<br>[ ][ ][ ][ ][ ]                                                                                                    | 1 = Syrup<br>2 = Suspension<br>3 = Liquid inj.<br>4 = Powder inj.<br>6 = Other<br>(specify)<br>[ ]                                                                                                                     |                                                                                                                                                                                                                                                                 |                        |
| <b>6. Country of manufacture</b>                                       | <b>7. Package size (Fill in number)</b><br><br>There are a total of [ ][ ][ ][ ] mL (or mg for powder injections) in each:<br><br>1 = Bottle<br>2 = Ampoule/vial | <b>8. Does this product have the AMFm logo?</b><br><br>1 = Yes<br>0 = No                                                                                                   | <b>9. Amount sold/distributed in the last 7 days to individual consumers</b><br>This outlet sold [ ][ ][ ][ ] bottles, ampoules or vials in the last 7 days<br><br><b>Refused = 9997</b><br><b>Don't know = 9998</b> | <b>10. Retail selling price</b><br>[ ][ ][ ][ ] bottles ampoules or vials cost an individual customer<br><br>[ ][ ][ ][ ][ ][ ]KSH<br><br><b>Free = 00000;</b><br><b>Refused = 99997;</b><br><b>Don't know = 99998</b> | <b>11. Wholesale purchase price</b><br>For the outlet's most recent wholesale purchase:<br><br>[ ][ ][ ][ ][ ] bottles, ampoules or vials cost<br><br>[ ][ ][ ][ ][ ][ ]KSH<br><br><b>Free = 00000;</b><br><b>Refused = 99997;</b><br><b>Don't know = 99998</b> | <b>12. Comments</b>    |
| <div style="text-align: center;">[ ][ ][ ]<br/>Do not write here</div> | <div style="text-align: center;">[ ]</div>                                                                                                                       | <div style="text-align: center;">[ ]</div>                                                                                                                                 |                                                                                                                                                                                                                      |                                                                                                                                                                                                                        |                                                                                                                                                                                                                                                                 |                        |

|                                  |                                                                                                                                                                           |                                                                          |                                                                                                                                                                                                                      |                                                                                                                                                                                                                     |                                                                                                                                                                                                                                                              |                      |                        |
|----------------------------------|---------------------------------------------------------------------------------------------------------------------------------------------------------------------------|--------------------------------------------------------------------------|----------------------------------------------------------------------------------------------------------------------------------------------------------------------------------------------------------------------|---------------------------------------------------------------------------------------------------------------------------------------------------------------------------------------------------------------------|--------------------------------------------------------------------------------------------------------------------------------------------------------------------------------------------------------------------------------------------------------------|----------------------|------------------------|
| <b>Product number</b>            | [ ][ ]<br>[ ][ ]<br>[ ][ ]                                                                                                                                                | <b>1. Generic name</b>                                                   | <b>2. Strength</b><br>[ ][ ][ ][ ].[ ]mg / [ ][ ][ ]mL<br>[ ][ ][ ][ ].[ ]mg / [ ][ ][ ]mL<br>[ ][ ][ ][ ].[ ]mg / [ ][ ][ ]mL<br><i>(Note: no mL recorded for powder injections)</i>                                | <b>2a. Is this the base?</b><br>[ ]      1 = Yes<br>[ ]      0 = No<br>[ ]      8 = Don't know<br><br><i>If no, specify excipient</i><br>[ ]                                                                        | <b>3. Dosage form</b><br>1 = Syrup<br>2 = Suspension<br>3 = Liquid inj.<br>4 = Powder inj.<br>6 = Other<br><b>(specify)</b><br>[ ]                                                                                                                           | <b>4. Brand name</b> | <b>5. Manufacturer</b> |
| <b>6. Country of manufacture</b> | <b>7. Package size</b> ( <i>Fill in number</i> )<br><br>There are a total of [ ][ ][ ][ ] mL (or mg for powder injections) in each:<br><br>1 = Bottle<br>2 = Ampoule/vial | <b>8. Does this product have the AMFm logo?</b><br><br>1 = Yes<br>0 = No | <b>9. Amount sold/distributed in the last 7 days to individual consumers</b><br>This outlet sold [ ][ ][ ][ ] bottles, ampoules or vials in the last 7 days<br><br><b>Refused = 9997</b><br><b>Don't know = 9998</b> | <b>10. Retail selling price</b><br>[ ][ ][ ][ ] bottles ampoules or vials cost an individual customer<br><br>[ ][ ][ ][ ][ ]KSH<br><br><b>Free = 00000;</b><br><b>Refused = 99997;</b><br><b>Don't know = 99998</b> | <b>11. Wholesale purchase price</b><br>For the outlet's most recent wholesale purchase:<br><br>[ ][ ][ ][ ][ ] bottles, ampoules or vials cost<br><br>[ ][ ][ ][ ][ ]KSH<br><br><b>Free = 00000;</b><br><b>Refused = 99997;</b><br><b>Don't know = 99998</b> | <b>12. Comments</b>  |                        |
| [ ][ ][ ]<br>Do not write here   | [ ]                                                                                                                                                                       | [ ]                                                                      |                                                                                                                                                                                                                      |                                                                                                                                                                                                                     |                                                                                                                                                                                                                                                              |                      |                        |

Outlet ID: [ ][ ]-[ ][ ][ ][ ]-[ ][ ][ ][ ]-[ ][ ][ ][ ][ ]-[ ][ ][ ][ ]

|                                                                        |                                                                                                                                                                  |                                                                                                                                                                            |                                                                                                                                                                                                                         |                                                                                                                                                                                                                |                                                                                                                                                                                                                                                         |                      |                        |
|------------------------------------------------------------------------|------------------------------------------------------------------------------------------------------------------------------------------------------------------|----------------------------------------------------------------------------------------------------------------------------------------------------------------------------|-------------------------------------------------------------------------------------------------------------------------------------------------------------------------------------------------------------------------|----------------------------------------------------------------------------------------------------------------------------------------------------------------------------------------------------------------|---------------------------------------------------------------------------------------------------------------------------------------------------------------------------------------------------------------------------------------------------------|----------------------|------------------------|
| <b>Product number</b>                                                  | <b>1. Generic name</b>                                                                                                                                           | <b>2. Strength</b>                                                                                                                                                         | <b>2a. Is this the base?</b>                                                                                                                                                                                            |                                                                                                                                                                                                                | <b>3. Dosage form</b>                                                                                                                                                                                                                                   | <b>4. Brand name</b> | <b>5. Manufacturer</b> |
| [ ][ ]<br>[ ][ ]<br>[ ][ ]                                             | [ ][ ]<br>[ ][ ]<br>[ ][ ]<br><div style="text-align: center;">[ ][ ]<br/>Do not write here</div>                                                                | [ ][ ][ ][ ].[ ][ ]mg / [ ][ ][ ][ ]mL<br>[ ][ ][ ][ ].[ ][ ]mg / [ ][ ][ ][ ]mL<br>[ ][ ][ ][ ].[ ][ ]mg / [ ][ ][ ][ ]mL<br>(Note: no mL recorded for powder injections) | [ ]      1 = Yes<br>[ ]      0 = No<br>[ ]      8 = Don't know<br><br>If no, specify excipient<br>[ ][ ][ ][ ][ ]                                                                                                       |                                                                                                                                                                                                                | 1 = Syrup<br>2 = Suspension<br>3 = Liquid inj.<br>4 = Powder inj.<br>6 = Other<br>(specify)<br>[ ]                                                                                                                                                      |                      |                        |
| <b>6. Country of manufacture</b>                                       | <b>7. Package size (Fill in number)</b><br><br>There are a total of [ ][ ][ ][ ] mL (or mg for powder injections) in each:<br><br>1 = Bottle<br>2 = Ampoule/vial | <b>8. Does this product have the AMFm logo?</b><br><br>1 = Yes<br>0 = No                                                                                                   | <b>9. Amount sold/distributed in the last 7 days to individual consumers</b><br>This outlet sold<br>[ ][ ][ ][ ] bottles, ampoules or vials in the last 7 days<br><br><i>Refused = 9997</i><br><i>Don't know = 9998</i> | <b>10. Retail selling price</b><br>[ ][ ][ ][ ] bottles ampoules or vials cost an individual customer<br>[ ][ ][ ][ ][ ][ ]KSH<br><i>Free = 00000;</i><br><i>Refused = 99997;</i><br><i>Don't know = 99998</i> | <b>11. Wholesale purchase price</b><br>For the outlet's most recent wholesale purchase:<br><br>[ ][ ][ ][ ][ ] bottles, ampoules or vials cost<br>[ ][ ][ ][ ][ ][ ]KSH<br><i>Free = 00000;</i><br><i>Refused = 99997;</i><br><i>Don't know = 99998</i> | <b>12. Comments</b>  |                        |
| <div style="text-align: center;">[ ][ ][ ]<br/>Do not write here</div> | <div style="text-align: center;">[ ]</div>                                                                                                                       | <div style="text-align: center;">[ ]</div>                                                                                                                                 |                                                                                                                                                                                                                         |                                                                                                                                                                                                                |                                                                                                                                                                                                                                                         |                      |                        |

|                                     |                                                                                                                                                           |                                                                   |                                                                                                                                                                                                                             |                                                                                                                                                                                                                  |                                                                                                                                                                                                                                                       |               |                 |
|-------------------------------------|-----------------------------------------------------------------------------------------------------------------------------------------------------------|-------------------------------------------------------------------|-----------------------------------------------------------------------------------------------------------------------------------------------------------------------------------------------------------------------------|------------------------------------------------------------------------------------------------------------------------------------------------------------------------------------------------------------------|-------------------------------------------------------------------------------------------------------------------------------------------------------------------------------------------------------------------------------------------------------|---------------|-----------------|
| Product number<br><br><br>[ ][ ][ ] | [ ][ ]                                                                                                                                                    | 1. Generic name                                                   | 2. Strength                                                                                                                                                                                                                 | 2a. Is this the base?                                                                                                                                                                                            | 3. Dosage form                                                                                                                                                                                                                                        | 4. Brand name | 5. Manufacturer |
|                                     | [ ][ ]                                                                                                                                                    |                                                                   | [ ][ ][ ][ ].[ ]mg / [ ][ ][ ]mL                                                                                                                                                                                            | [ ] 1 = Yes                                                                                                                                                                                                      | 1 = Syrup                                                                                                                                                                                                                                             |               |                 |
|                                     | [ ][ ]                                                                                                                                                    |                                                                   | [ ][ ][ ][ ].[ ]mg / [ ][ ][ ]mL                                                                                                                                                                                            | [ ] 0 = No                                                                                                                                                                                                       | 2 = Suspension                                                                                                                                                                                                                                        |               |                 |
|                                     | [ ][ ]                                                                                                                                                    |                                                                   | [ ][ ][ ][ ].[ ]mg / [ ][ ][ ]mL<br>(Note: no mL recorded for powder injections)                                                                                                                                            | [ ] 8 = Don't know                                                                                                                                                                                               | 3 = Liquid inj.                                                                                                                                                                                                                                       |               |                 |
|                                     | [ ][ ]<br>Do not write here                                                                                                                               |                                                                   |                                                                                                                                                                                                                             | If no, specify excipient<br>[ ]                                                                                                                                                                                  | 4 = Powder inj.                                                                                                                                                                                                                                       |               |                 |
|                                     |                                                                                                                                                           |                                                                   |                                                                                                                                                                                                                             |                                                                                                                                                                                                                  | 6 = Other<br>(specify)<br>[ ]                                                                                                                                                                                                                         |               |                 |
| 6. Country of manufacture           | 7. Package size (Fill in number)<br><br>There are a total of [ ][ ][ ][ ] mL (or mg for powder injections) in each:<br><br>1 = Bottle<br>2 = Ampoule/vial | 8. Does this product have the AMFm logo?<br><br>1 = Yes<br>0 = No | 9. Amount sold/distributed in the <u>last 7 days</u> to individual consumers<br>This outlet sold [ ][ ][ ][ ] bottles, ampoules or vials in the <u>last 7 days</u><br><br><i>Refused = 9997</i><br><i>Don't know = 9998</i> | 10. Retail selling price<br><br>[ ][ ][ ][ ] bottles ampoules or vials cost an individual customer<br><br>[ ][ ][ ][ ][ ]KSH<br><br><i>Free = 00000;</i><br><i>Refused = 99997;</i><br><i>Don't know = 99998</i> | 11. Wholesale purchase price<br>For the outlet's most recent wholesale purchase:<br><br>[ ][ ][ ][ ][ ] bottles, ampoules or vials cost<br><br>[ ][ ][ ][ ][ ]KSH<br><br><i>Free = 00000;</i><br><i>Refused = 99997;</i><br><i>Don't know = 99998</i> | 12. Comments  |                 |
| [ ][ ][ ]<br>Do not write here      | [ ]                                                                                                                                                       | [ ]                                                               |                                                                                                                                                                                                                             |                                                                                                                                                                                                                  |                                                                                                                                                                                                                                                       |               |                 |

Outlet ID: [ ][ ]-[ ][ ][ ][ ]-[ ][ ][ ][ ]-[ ][ ][ ][ ][ ]-[ ][ ][ ][ ]

|                                                                 |                                                                                                                                                                      |                                                                                                                                                                                               |                                                                                                                                                                                                                             |                                                                                                                                                                                                                     |                                                                                                                                                                                                                                                          |                 |
|-----------------------------------------------------------------|----------------------------------------------------------------------------------------------------------------------------------------------------------------------|-----------------------------------------------------------------------------------------------------------------------------------------------------------------------------------------------|-----------------------------------------------------------------------------------------------------------------------------------------------------------------------------------------------------------------------------|---------------------------------------------------------------------------------------------------------------------------------------------------------------------------------------------------------------------|----------------------------------------------------------------------------------------------------------------------------------------------------------------------------------------------------------------------------------------------------------|-----------------|
| Product number<br><br>[ ][ ][ ]                                 | 1. Generic name<br><br>[ ][ ][ ]<br>[ ][ ][ ]<br>[ ][ ][ ]<br><br>[ ][ ][ ]<br>Do not write here                                                                     | 2. Strength<br><br>[ ][ ][ ][ ].[ ][ ]mg / [ ][ ][ ][ ]mL<br>[ ][ ][ ][ ].[ ][ ]mg / [ ][ ][ ][ ]mL<br>[ ][ ][ ][ ].[ ][ ]mg / [ ][ ][ ][ ]mL<br>(Note: no mL recorded for powder injections) | 2a. Is this the base?<br><br>[ ] 1 = Yes<br>[ ] 0 = No<br>[ ] 8 = Don't know<br><br>If no, specify excipient<br>[ ][ ][ ][ ][ ]                                                                                             | 3. Dosage form<br><br>1 = Syrup<br>2 = Suspension<br>3 = Liquid inj.<br>4 = Powder inj.<br>6 = Other<br>(specify)<br>[ ]                                                                                            | 4. Brand name                                                                                                                                                                                                                                            | 5. Manufacturer |
| 6. Country of manufacture<br><br>[ ][ ][ ]<br>Do not write here | 7. Package size (Fill in number)<br><br>There are a total of [ ][ ][ ][ ] mL (or mg for powder injections) in each:<br><br>1 = Bottle<br>2 = Ampoule/vial<br><br>[ ] | 8. Does this product have the AMFm logo?<br><br>1 = Yes<br>0 = No<br><br>[ ]                                                                                                                  | 9. Amount sold/distributed in the <u>last 7 days</u> to individual consumers<br>This outlet sold [ ][ ][ ][ ] bottles, ampoules or vials in the <u>last 7 days</u><br><br><b>Refused = 9997</b><br><b>Don't know = 9998</b> | 10. Retail selling price<br><br>[ ][ ][ ][ ] bottles ampoules or vials cost an individual customer<br><br>[ ][ ][ ][ ][ ][ ]KSH<br><br><b>Free = 00000;</b><br><b>Refused = 99997;</b><br><b>Don't know = 99998</b> | 11. Wholesale purchase price<br>For the outlet's most recent wholesale purchase:<br><br>[ ][ ][ ][ ][ ] bottles, ampoules or vials cost<br><br>[ ][ ][ ][ ][ ][ ]KSH<br><br><b>Free = 00000;</b><br><b>Refused = 99997;</b><br><b>Don't know = 99998</b> | 12. Comments    |

|                                     |                                                                                                                                                           |                                                                   |                                                                                                                                                                                                                             |                                                                                                                                                                                                                  |                                                                                                                                                                                                                                                       |               |                 |
|-------------------------------------|-----------------------------------------------------------------------------------------------------------------------------------------------------------|-------------------------------------------------------------------|-----------------------------------------------------------------------------------------------------------------------------------------------------------------------------------------------------------------------------|------------------------------------------------------------------------------------------------------------------------------------------------------------------------------------------------------------------|-------------------------------------------------------------------------------------------------------------------------------------------------------------------------------------------------------------------------------------------------------|---------------|-----------------|
| Product number<br><br><br>[ ][ ][ ] | [ ][ ]<br>[ ][ ]<br>[ ][ ]<br>[ ][ ]<br>Do not write here                                                                                                 | 1. Generic name                                                   | 2. Strength                                                                                                                                                                                                                 | 2a. Is this the base?                                                                                                                                                                                            | 3. Dosage form                                                                                                                                                                                                                                        | 4. Brand name | 5. Manufacturer |
|                                     |                                                                                                                                                           |                                                                   | [ ][ ][ ][ ].[ ]mg / [ ][ ][ ]mL                                                                                                                                                                                            | [ ] 1 = Yes                                                                                                                                                                                                      | 1 = Syrup                                                                                                                                                                                                                                             |               |                 |
|                                     |                                                                                                                                                           |                                                                   | [ ][ ][ ][ ].[ ]mg / [ ][ ][ ]mL                                                                                                                                                                                            | [ ] 0 = No                                                                                                                                                                                                       | 2 = Suspension                                                                                                                                                                                                                                        |               |                 |
|                                     |                                                                                                                                                           |                                                                   | [ ][ ][ ][ ].[ ]mg / [ ][ ][ ]mL<br>(Note: no mL recorded for powder injections)                                                                                                                                            | [ ] 8 = Don't know                                                                                                                                                                                               | 3 = Liquid inj.<br>4 = Powder inj.<br>6 = Other<br>(specify)                                                                                                                                                                                          |               |                 |
|                                     |                                                                                                                                                           |                                                                   |                                                                                                                                                                                                                             | If no, specify excipient<br>[ ]                                                                                                                                                                                  | [ ]                                                                                                                                                                                                                                                   |               |                 |
| 6. Country of manufacture           | 7. Package size (Fill in number)<br><br>There are a total of [ ][ ][ ][ ] mL (or mg for powder injections) in each:<br><br>1 = Bottle<br>2 = Ampoule/vial | 8. Does this product have the AMFm logo?<br><br>1 = Yes<br>0 = No | 9. Amount sold/distributed in the <u>last 7 days</u> to individual consumers<br>This outlet sold [ ][ ][ ][ ] bottles, ampoules or vials in the <u>last 7 days</u><br><br><i>Refused = 9997</i><br><i>Don't know = 9998</i> | 10. Retail selling price<br><br>[ ][ ][ ][ ] bottles ampoules or vials cost an individual customer<br><br>[ ][ ][ ][ ][ ]KSH<br><br><i>Free = 00000;</i><br><i>Refused = 99997;</i><br><i>Don't know = 99998</i> | 11. Wholesale purchase price<br>For the outlet's most recent wholesale purchase:<br><br>[ ][ ][ ][ ][ ] bottles, ampoules or vials cost<br><br>[ ][ ][ ][ ][ ]KSH<br><br><i>Free = 00000;</i><br><i>Refused = 99997;</i><br><i>Don't know = 99998</i> | 12. Comments  |                 |
| [ ][ ][ ]<br>Do not write here      | [ ]                                                                                                                                                       | [ ]                                                               |                                                                                                                                                                                                                             |                                                                                                                                                                                                                  |                                                                                                                                                                                                                                                       |               |                 |



|                                                                                                                                                                                                                                                                                                                                                                                                                                                       |                     |                 |                   |                     |
|-------------------------------------------------------------------------------------------------------------------------------------------------------------------------------------------------------------------------------------------------------------------------------------------------------------------------------------------------------------------------------------------------------------------------------------------------------|---------------------|-----------------|-------------------|---------------------|
| P18. Interviewer: Were any of the antimalarials recorded in the audit sheets QAACTs?                                                                                                                                                                                                                                                                                                                                                                  |                     | [ ]             |                   |                     |
| _____ 1 = Yes <b>gather samples of all QAAC T products currently in stock</b><br>_____ 0 = No <b>go to P23</b>                                                                                                                                                                                                                                                                                                                                        |                     |                 |                   |                     |
| <b>The following questions are for outlets that have at least one QAAC T in stock</b>                                                                                                                                                                                                                                                                                                                                                                 |                     |                 |                   |                     |
| → P19. In the past 7 days, have you ever been out of stock of <b>all</b> these antimalarials ( <b>show all gathered QAAC T antimalarials</b> ) at the same time for at least one day?<br>1 = Yes<br>0 = No <b>go to P21</b><br>7 = Refuses <b>go to P21</b><br>8 = Don't know <b>go to P21</b>                                                                                                                                                        |                     | [ ]             |                   |                     |
| P20. At the time you were out of stock of all of these antimalarials ( <b>show all gathered QAAC T antimalarials</b> ), did you have any of these other products in stock? <b>Show prompt card of QAAC Ts</b><br><br>1 = Yes, <b>specify</b> [_____] <div style="margin-left: 150px;">[_____]</div> <div style="margin-left: 150px;">[_____]</div><br><br>0 = No<br>7 = Refuses<br>8 = Don't know                                                     |                     | [ ]             |                   |                     |
| P21. Please explain the dosing regimen of any one of these products ( <b>show all gathered QAAC T antimalarials</b> ) for an adult (60kg). <b>Read the following 3 questions to the provider</b><br><br>I. How many tablets should they take at a time? [ ][ ].[ ][ ]<br>II. How many times per day? [ ][ ]<br>III. Over how many days? [ ][ ]<br><br>95 = Not applicable, I would not give/sell any of these products to an adult<br>98 = Don't know |                     |                 |                   |                     |
| <b>Record the following information from the package of the drug selected by the provider:</b>                                                                                                                                                                                                                                                                                                                                                        |                     |                 |                   |                     |
|                                                                                                                                                                                                                                                                                                                                                                                                                                                       | <b>Generic name</b> | <b>Strength</b> | <b>Brand Name</b> | <b>Manufacturer</b> |
| [ ][ ]                                                                                                                                                                                                                                                                                                                                                                                                                                                | _____               | [ ][ ][ ].[ ]mg |                   |                     |
| [ ][ ]                                                                                                                                                                                                                                                                                                                                                                                                                                                | _____               | [ ][ ][ ].[ ]mg |                   |                     |
| [ ][ ]                                                                                                                                                                                                                                                                                                                                                                                                                                                | _____               | [ ][ ][ ].[ ]mg |                   |                     |
| Do not write here [ ][ ]                                                                                                                                                                                                                                                                                                                                                                                                                              |                     |                 |                   |                     |



P22. Please explain the dosing regimen of any one of these products (**show all gathered QAACT antimalarials**) for a child under 2 (10kg). **Read the following 3 questions to the provider**

I. How many tablets should they take at a time? [ ][ ][ ]

II. How many times per day? [ ][ ]

III. Over how many days? [ ][ ]

95 = Not applicable, I would not give/sell any of these products to a child

98 = Don't know

**Record the following information from the package of the drug selected by the provider**

|                             | Generic name | Strength           | Brand Name | Manufacturer |
|-----------------------------|--------------|--------------------|------------|--------------|
| [ ][ ]                      | _____        | [ ][ ][ ]-[ ][ ]mg |            |              |
| [ ][ ]                      | _____        | [ ][ ][ ]-[ ][ ]mg |            |              |
| [ ][ ]                      | _____        | [ ][ ][ ]-[ ][ ]mg |            |              |
| Do not write here<br>[ ][ ] |              |                    |            |              |

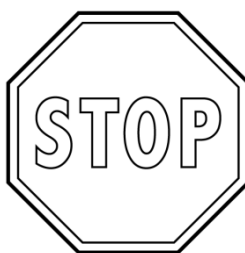

**Go to N1**

**The following questions are for outlets that DO NOT have QAACTs in stock**

P23. Have you stocked any of these antimalarials (**show prompt card of QAACTs**) in the last four weeks?

1 = Yes, **specify** [\_\_\_\_\_]

[\_\_\_\_\_]

[\_\_\_\_\_]

0 = No

[ ]

|                                                                                                                                                                                                                                                                                                                                                                                                                                                                                                                                                                                                                                                                                                                                                                                                                            |  |
|----------------------------------------------------------------------------------------------------------------------------------------------------------------------------------------------------------------------------------------------------------------------------------------------------------------------------------------------------------------------------------------------------------------------------------------------------------------------------------------------------------------------------------------------------------------------------------------------------------------------------------------------------------------------------------------------------------------------------------------------------------------------------------------------------------------------------|--|
| <p>P24. What are the reasons that you don't have any of these antimalarials (<b>Show prompt card of QAACTs</b>) in stock? <b>Do not read list. Multiple responses allowed. Repeat prompt "anything else" until no more suggestions are provided</b></p> <p>1 = response mentioned<br/>0 = response not mentioned</p> <p>I. It is too expensive [ ]</p> <p>II. It is not profitable [ ]</p> <p>III. The outlet is not allowed to sell it [ ]</p> <p>IV. It has too many side effects [ ]</p> <p>V. It does not work well [ ]</p> <p>VI. It is not available/my suppliers do not have it in stock [ ]</p> <p>VII. My customers do not ask for it [ ]</p> <p>VIII. I don't know about these drugs [ ]</p> <p>IX. I am temporarily out of stock [ ]</p> <p>X. Other (<b>specify</b>): [ ]</p> <p>[ ]</p> <p>[ ]</p> <p>[ ]</p> |  |
|----------------------------------------------------------------------------------------------------------------------------------------------------------------------------------------------------------------------------------------------------------------------------------------------------------------------------------------------------------------------------------------------------------------------------------------------------------------------------------------------------------------------------------------------------------------------------------------------------------------------------------------------------------------------------------------------------------------------------------------------------------------------------------------------------------------------------|--|

| <b>The following questions are for all outlets</b>                                                                                                                                      |            |
|-----------------------------------------------------------------------------------------------------------------------------------------------------------------------------------------|------------|
| <p>N1 Have you heard of the programme that reduces the prices of antimalarial medicines known as ACTs?</p> <p>1 = Yes<br/>0 = No <b>Go to N3</b><br/>8 = Don't know <b>Go to N3</b></p> | <p>[ ]</p> |

|                                                                                                                                                                                                                                                                                                                                                                                                                                                                                                                                                                                                                                                                                                                                                                                                                                                                                                                                                                                                 |                  |
|-------------------------------------------------------------------------------------------------------------------------------------------------------------------------------------------------------------------------------------------------------------------------------------------------------------------------------------------------------------------------------------------------------------------------------------------------------------------------------------------------------------------------------------------------------------------------------------------------------------------------------------------------------------------------------------------------------------------------------------------------------------------------------------------------------------------------------------------------------------------------------------------------------------------------------------------------------------------------------------------------|------------------|
| <p>N2. How did you hear about the programme? <b>Do not read list. Multiple responses allowed. Repeat prompt “anything else” until no more suggestions are provided</b></p> <p>1 = response mentioned<br/>0 = response not mentioned</p> <p>I. On malaria medicine packaging [ ]</p> <p>II. On medicine packaging [ ]</p> <p>III. On posters [ ]</p> <p>IV. On billboards [ ]</p> <p>V. On TV/radio [ ]</p> <p>VI. On a prescription [ ]</p> <p>VII. In newspapers/magazines [ ]</p> <p>VIII. In pharmacies/ drug shops [ ]</p> <p>IX. In private clinics [ ]</p> <p>X. In public health facilities [ ]</p> <p>XI. In training [ ]</p> <p>XII. From a supplier (including medical representative) [ ]</p> <p>XIII. From a public event [ ]</p> <p>XIV. From a local leader [ ]</p> <p>XV. From a friend/family member [ ]</p> <p>XVI. SMS messages [ ]</p> <p>XVII. On the internet [ ]</p> <p>XVIII. Don't Know [ ]</p> <p>XIX. Other (<i>specify</i>) [ ]</p> <p>[ ]</p> <p>[ ]</p> <p>[ ]</p> |                  |
| <p>N3. Are there recommended retail prices for antimalarials with this symbol? <b>Show prompt card with AMFm logo</b></p> <p>1= Yes<br/>0 = No <b>go to N5</b><br/>8 = Don't know <b>go to N5</b></p>                                                                                                                                                                                                                                                                                                                                                                                                                                                                                                                                                                                                                                                                                                                                                                                           | [ ]              |
| <p>N4. What is the recommended retail price for an adult dose?</p> <p>9998 = Don't know</p>                                                                                                                                                                                                                                                                                                                                                                                                                                                                                                                                                                                                                                                                                                                                                                                                                                                                                                     | [ ][ ][ ][ ] KSH |
| <p>N5. Has anyone at this outlet received training on malaria treatment during the last 12 months? <b>Include pre-service and stand-alone workshops</b></p> <p>1 = Yes<br/>0 = No<br/>8 = Don't know</p>                                                                                                                                                                                                                                                                                                                                                                                                                                                                                                                                                                                                                                                                                                                                                                                        | [ ]              |

|                                                                                                                                                                                          |            |
|------------------------------------------------------------------------------------------------------------------------------------------------------------------------------------------|------------|
| <p>N6. Did anyone at this outlet attend a training session about antimalarials with this symbol? <b>Show prompt card with AMFm logo</b></p> <p>1 = Yes<br/>0 = No<br/>8 = Don't know</p> | <p>[ ]</p> |
|------------------------------------------------------------------------------------------------------------------------------------------------------------------------------------------|------------|

Diagnostic testing

|                                                                                                                                                                                                                                                                                                                                     |                           |
|-------------------------------------------------------------------------------------------------------------------------------------------------------------------------------------------------------------------------------------------------------------------------------------------------------------------------------------|---------------------------|
| <p>P25. Is malaria microscopic testing available here today?<br/>1 = Yes<br/>0 = No <b>go to P29</b><br/>8 = Don't know <b>go to P29</b></p>                                                                                                                                                                                        | <p>[ ]</p>                |
| <p>P26. For an adult, how much do you charge for a microscopic test for malaria?<br/>0000 = Free<br/>9998 = Don't know</p>                                                                                                                                                                                                          | <p>[ ][ ][ ][ ][ ]KSH</p> |
| <p>P27. For a child under 5, how much do you charge for a microscopic test for malaria? <b>If the price is the same for all ages, copy the price from the previous question.</b><br/>0000 = Free<br/>9998 = Don't know</p>                                                                                                          | <p>[ ][ ][ ][ ][ ]KSH</p> |
| <p>P28. How many microscopic tests for malaria did you conduct over the last 7 days?<br/>9998 = Don't know</p>                                                                                                                                                                                                                      | <p>[ ][ ][ ][ ][ ]</p>    |
| <p>P29. Are malaria rapid diagnostic test kits (RDTs) available here today?<br/>1 = Yes<br/>0 = No <b>go to Section V: Audit Tracking Sheet</b><br/>8 = Don't know <b>go to Section V: Audit Tracking Sheet</b></p>                                                                                                                 | <p>[ ]</p>                |
| <p>P30. Please show us the full range of RDTs that you currently have in stock. Do you currently have any of the following? <b>Read entire list; No response to be recorded</b></p> <p>ICT<br/>ParaCheck<br/>Para-F<br/>Malcheck<br/>OptiMal-IT<br/>Malaria PF<br/>FirstSign<br/>Eurocheck<br/>Acon<br/>OnSight Malaria Pf Test</p> |                           |

**Section IV: RDT Audit Sheets**

**Proceed to the RDT audit. Attach additional audit sheets to the end of the questionnaire, if necessary.**

**Number each completed audit sheet sequentially in the space provided at the bottom of each page.**

# Rapid Diagnostic Test Audit Sheet (RDT)

Outlet ID: [ ][ ]-[ ][ ][ ][ ]-[ ][ ][ ][ ]-[ ][ ][ ][ ][ ]

| Product number | 1. Brand name                  | 2. Manufacturer                | 3. Country of Manufacture      | 4. Amount sold/ distributed/ used in the last 7 days to individual consumers<br>(Record total # of tests)                         | 5. Retail selling price for adults                                                                                                  | 6. Retail selling price for children under 5                                                                                                                                                                                       | 7. Wholesale purchase price                                                                                                                                                                   | 8. Comments |
|----------------|--------------------------------|--------------------------------|--------------------------------|-----------------------------------------------------------------------------------------------------------------------------------|-------------------------------------------------------------------------------------------------------------------------------------|------------------------------------------------------------------------------------------------------------------------------------------------------------------------------------------------------------------------------------|-----------------------------------------------------------------------------------------------------------------------------------------------------------------------------------------------|-------------|
| [ ][ ][ ]      |                                |                                |                                | This outlet sold or distributed<br><br>[ ][ ][ ][ ] tests in the last week<br><br><b>9997 = Refused</b><br><b>9998=Don't know</b> | For 1 test, you charge<br><br>[ ][ ][ ][ ][ ]KSH<br><br><b>Free = 00000;</b><br><b>Refused = 99997</b><br><b>Don't know = 99998</b> | For 1 test, you charge<br><br>[ ][ ][ ][ ][ ]KSH<br><br><b>Free = 00000;</b><br><b>Refused = 99997</b><br><b>Don't know = 99998</b><br><br><b>If the price is the same for all ages, copy the price from the previous question</b> | For the outlet's most recent wholesale purchase:<br><br>[ ][ ][ ][ ] tests cost<br><br>[ ][ ][ ][ ][ ]KSH<br><br><b>Free = 00000;</b><br><b>Refused = 99997;</b><br><b>Don't know = 99998</b> |             |
|                | Do not write here<br>[ ][ ][ ] | Do not write here<br>[ ][ ][ ] | Do not write here<br>[ ][ ][ ] |                                                                                                                                   |                                                                                                                                     |                                                                                                                                                                                                                                    |                                                                                                                                                                                               |             |

| Product number | 1. Brand name                  | 2. Manufacturer                | 3. Country of Manufacture      | 4. Amount sold/ distributed/ used in the last 7 days to individual consumers<br>(Record total # of tests)                     | 5. Retail selling price for adults                                                                                                  | 6. Retail selling price for children under 5                                                                                                                                                                                       | 7. Wholesale purchase price                                                                                                                                                                  | 8. Comments |
|----------------|--------------------------------|--------------------------------|--------------------------------|-------------------------------------------------------------------------------------------------------------------------------|-------------------------------------------------------------------------------------------------------------------------------------|------------------------------------------------------------------------------------------------------------------------------------------------------------------------------------------------------------------------------------|----------------------------------------------------------------------------------------------------------------------------------------------------------------------------------------------|-------------|
| [ ][ ][ ]      |                                |                                |                                | This outlet sold or distributed<br><br>[ ][ ][ ][ ] tests in the last week<br><b>9997 = Refused</b><br><b>9998=Don't know</b> | For 1 test, you charge<br><br>[ ][ ][ ][ ][ ]KSH<br><br><b>Free = 00000;</b><br><b>Refused = 99997</b><br><b>Don't know = 99998</b> | For 1 test, you charge<br><br>[ ][ ][ ][ ][ ]KSH<br><br><b>Free = 00000;</b><br><b>Refused = 99997</b><br><b>Don't know = 99998</b><br><br><b>If the price is the same for all ages, copy the price from the previous question</b> | For the outlet's most recent wholesale purchase:<br><br>[ ][ ][ ][ ] tests cost<br><br>[ ][ ][ ][ ][ ]KSH<br><br><b>Free = 00000;</b><br><b>Refused = 99997</b><br><b>Don't know = 99998</b> |             |
|                | Do not write here<br>[ ][ ][ ] | Do not write here<br>[ ][ ][ ] | Do not write here<br>[ ][ ][ ] |                                                                                                                               |                                                                                                                                     |                                                                                                                                                                                                                                    |                                                                                                                                                                                              |             |

# RAPID DIAGNOSTIC TEST AUDIT SHEET (RDT)

Outlet ID: [ ]-[ ]-[ ]-[ ]-[ ]

| Product number | 1. Brand name            | 2. Manufacturer          | 3. Country of Manufacture | 4. Amount sold/ distributed/ used in the last 7 days to individual consumers<br>(Record total # of tests)       | 5. Retail selling price for adults                                                                           | 6. Retail selling price for children under 5                                                                                                                                                                | 7. Wholesale purchase price                                                                                                                                  | 8. Comments |
|----------------|--------------------------|--------------------------|---------------------------|-----------------------------------------------------------------------------------------------------------------|--------------------------------------------------------------------------------------------------------------|-------------------------------------------------------------------------------------------------------------------------------------------------------------------------------------------------------------|--------------------------------------------------------------------------------------------------------------------------------------------------------------|-------------|
| [ ]            |                          |                          |                           | This outlet sold or distributed<br><br>[ ] tests in the last week<br><b>9997 = Refused;<br/>9998=Don't know</b> | For 1 test, you charge<br><br>[ ]KSH<br><br><b>Free = 00000;<br/>Refused = 99997'<br/>Don't know = 99998</b> | For 1 test, you charge<br><br>[ ]KSH<br><br><b>Free = 00000;<br/>Refused = 99997;<br/>Don't know = 99998</b><br><br><b>If the price is the same for all ages, copy the price from the previous question</b> | For the outlet's most recent wholesale purchase:<br><br>[ ] tests cost<br><br>[ ]KSH<br><br><b>Free = 00000;<br/>Refused = 99997;<br/>Don't know = 99998</b> |             |
|                | Do not write here<br>[ ] | Do not write here<br>[ ] | Do not write here<br>[ ]  |                                                                                                                 |                                                                                                              |                                                                                                                                                                                                             |                                                                                                                                                              |             |

| Product number | 1. Brand name            | 2. Manufacturer          | 3. Country of Manufacture | 4. Amount sold/ distributed/ used in the last 7 days to individual consumers<br>(Record total # of tests)      | 5. Retail selling price for adults                                                                          | 6. Retail selling price for children under 5                                                                                                                                                                | 7. Wholesale purchase price                                                                                                                                  | 8. Comments |
|----------------|--------------------------|--------------------------|---------------------------|----------------------------------------------------------------------------------------------------------------|-------------------------------------------------------------------------------------------------------------|-------------------------------------------------------------------------------------------------------------------------------------------------------------------------------------------------------------|--------------------------------------------------------------------------------------------------------------------------------------------------------------|-------------|
| [ ]            |                          |                          |                           | This outlet sold or distributed<br><br>[ ] tests in the last week<br><b>9997 = Refused<br/>9998=Don't know</b> | For 1 test, you charge<br><br>[ ]KSH<br><br><b>Free = 00000;<br/>Refused = 99997<br/>Don't know = 99998</b> | For 1 test, you charge<br><br>[ ]KSH<br><br><b>Free = 00000;<br/>Refused = 99997;<br/>Don't know = 99998</b><br><br><b>If the price is the same for all ages, copy the price from the previous question</b> | For the outlet's most recent wholesale purchase:<br><br>[ ] tests cost<br><br>[ ]KSH<br><br><b>Free = 00000;<br/>Refused = 99997;<br/>Don't know = 99998</b> |             |
|                | Do not write here<br>[ ] | Do not write here<br>[ ] | Do not write here<br>[ ]  |                                                                                                                |                                                                                                             |                                                                                                                                                                                                             |                                                                                                                                                              |             |

RDT Audit Sheet [ ] of [ ]

Outlet ID: [ ][ ]-[ ][ ][ ]-[ ][ ][ ]-[ ][ ][ ][ ]-[ ][ ][ ]

**Section V: Audit Tracking Sheet**

|                                                                                   |           |
|-----------------------------------------------------------------------------------|-----------|
| A1. Total number of Tablet, Suppository & Granule Audit <b><i>Sheets</i></b>      | [ ][ ][ ] |
| A1a. Total number of Tablet, Suppository & Granule <b><i>Products</i></b> Audited | [ ][ ][ ] |
| A2. Total number of Non-Tablet Audit <b><i>Sheets</i></b>                         | [ ][ ][ ] |
| A2a. Total number of Non-Tablet <b><i>Products</i></b> Audited                    | [ ][ ][ ] |
| A3. Total number of RDT Audit <b><i>Sheets</i></b>                                | [ ][ ][ ] |
| A3a. Total number of RDT <b><i>Products</i></b> Audited                           | [ ][ ][ ] |

***Return to C9 to record the final status of the interview before proceeding to Section VI: Ending the Interview***
